# Supplementary material for: Blend for all or pure for few? Well-to-wheel life cycle assessment of blending electricity-based OME3–5 with fossil diesel
Source: Royal Society of Chemistry journal article supplement (doi:10.1039/d1se01758f), 2022-01-01
Supplement: d1se01758f1.pdf [file d1se01758f1.pdf]

**Electronic Supporting Information (ESI):**

**Blend for All or Pure for Few?**

**Well-to-Wheel Life Cycle Assessment of Blending Electricity-Based OME<sub>3-5</sub> With Fossil Diesel**

*Simon Voelker<sup>a</sup>, Sarah Deutz<sup>a</sup>, Jannik Burre<sup>b</sup>, Dominik Bongartz<sup>b</sup>, Ahmad Omari<sup>c</sup>, Bastian Lehrheuer<sup>c</sup>,  
Alexander Mitsos<sup>d,b,f</sup>, Stefan Pischinger<sup>c</sup>, André Bardow<sup>a,d,e,f</sup>, and  
Niklas von der Assen<sup>a,\*</sup>*

<sup>a</sup> Institute of Technical Thermodynamics, RWTH Aachen University, Aachen 52062, Germany

<sup>b</sup> Process Systems Engineering, RWTH Aachen University, Aachen 52074, Germany

<sup>c</sup> Institute for Combustion Engines, RWTH Aachen University, Aachen 52074, Germany

<sup>d</sup> JARA-ENERGY, 52056 Aachen, GERMANY

<sup>e</sup> Energy & Process Systems Engineering, ETH Zurich, Zürich 8092, Switzerland

<sup>f</sup> Energy Systems Engineering (IEK-10), Forschungszentrum Jülich, Jülich 52425, Germany

\* Corresponding author: [niklas.vonderassen@itt.rwth-aachen.de](mailto:niklas.vonderassen@itt.rwth-aachen.de)

## S1 Well-to-tank: OME<sub>3-5</sub> production processes (worst-case scenario)

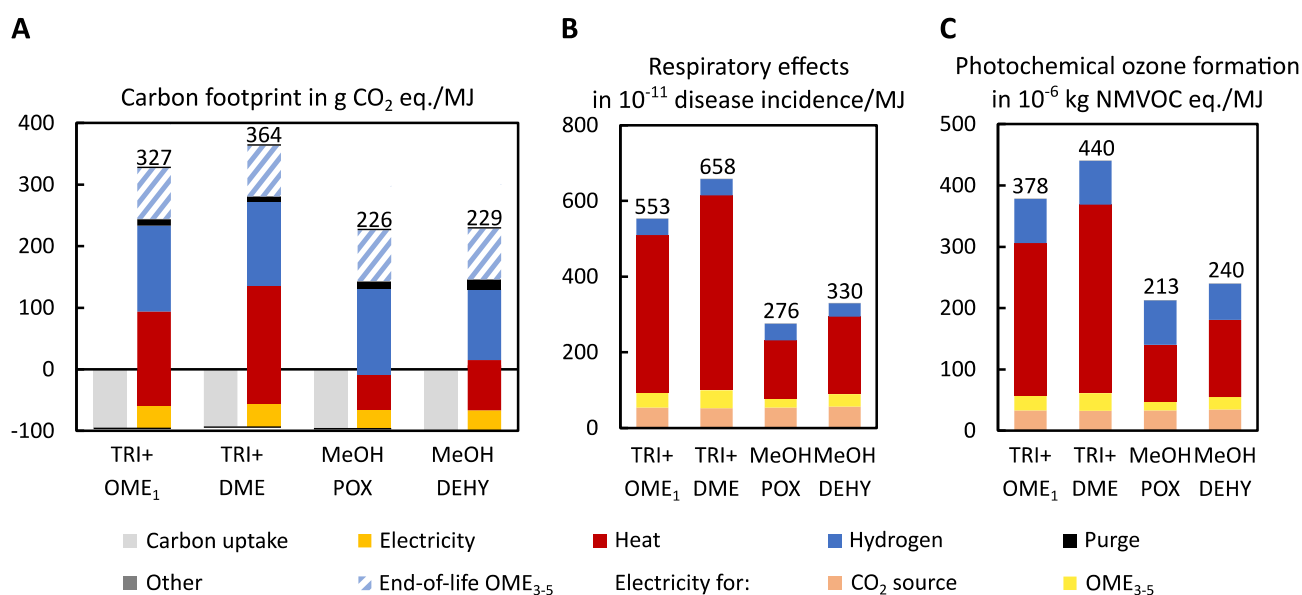

Figure S1: Well-to-tank (A) carbon footprint in g CO<sub>2</sub> eq. per MJ, (B) respiratory effects in 10<sup>-11</sup> disease incidence per MJ, and (C) photochemical ozone formation in 10<sup>-6</sup> kg NMVOC eq. per MJ of the four OME<sub>3-5</sub> production routes for the worst-case scenario. The carbon footprint of the carbon uptake due to CO<sub>2</sub> utilization is negative (light grey). Positive environmental impacts result from direct CO<sub>2</sub> emissions in purge gases from OME<sub>3-5</sub> production (black), electricity supply (yellow) that is further subdivided in electricity for OME<sub>3-5</sub> and CO<sub>2</sub> supply in (B) and (C), other emissions due to process water supply and wastewater treatment (dark grey), heat supply (red), and hydrogen supply (blue). Although not inside the system boundary of a well-to-tank analysis, we additionally indicate the end-of-life emissions from OME<sub>3-5</sub> combustion for the carbon footprint (A, hatched blue): The entire life cycle of CO<sub>2</sub>-based fuels cannot be carbon-negative and is thus carbon-neutral at best.

## S2 Well-to-tank: OME<sub>3-5</sub> production processes (best-case scenario with CO<sub>2</sub> from direct air capture)

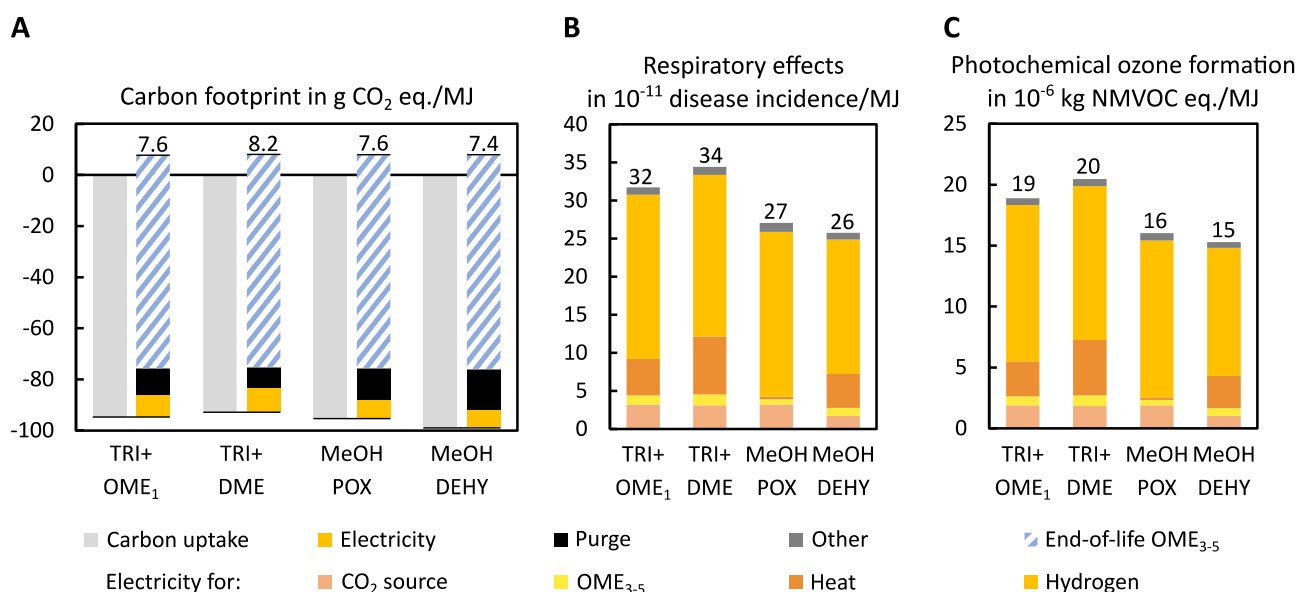

Figure S2: Well-to-tank (A) carbon footprint in g CO<sub>2</sub> eq. per MJ, (B) respiratory effects in 10<sup>-11</sup> disease incidence per MJ, and (C) photochemical ozone formation in 10<sup>-6</sup> kg NMVOC eq. per MJ of the four OME<sub>3-5</sub> production routes for the best-case scenario but now with CO<sub>2</sub> from direct air capture. The carbon footprint of the carbon uptake due to CO<sub>2</sub> utilization is negative (light grey). Positive environmental impacts result from direct CO<sub>2</sub> emissions in purge gases from OME<sub>3-5</sub> production (black), minor emissions due to process water supply and wastewater treatment (dark grey), and electricity supply (yellow). The electricity supply is further subdivided in electricity for hydrogen, heat, OME<sub>3-5</sub>, and CO<sub>2</sub> supply in (B) and (C). Although not inside the system boundary of a well-to-tank analysis, we additionally indicate the end-of-life emissions from OME<sub>3-5</sub> combustion for the carbon footprint (A, hatched blue): The entire life cycle of CO<sub>2</sub>-based fuels cannot be carbon-negative and is thus carbon-neutral at best.

### S3 Well-to-wheel: the entire life cycle of diesel-OME<sub>3-5</sub> blends (worst-case scenario)

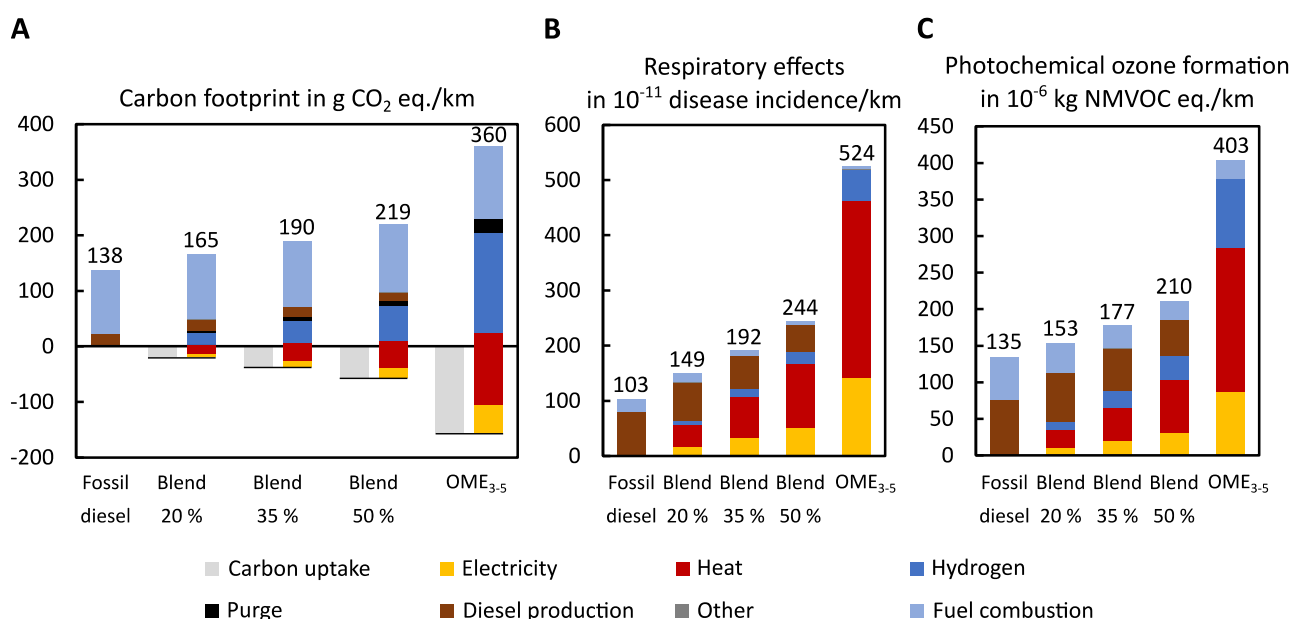

Figure S3: Well-to-wheel (A) carbon footprint in g CO<sub>2</sub> eq. per km, (B) respiratory effects in 10<sup>-11</sup> disease incidence per km, and (C) photochemical ozone formation in 10<sup>-6</sup> kg NMVOC eq. per km of pure fossil diesel, blends of OME<sub>3-5</sub> in fossil diesel, and pure OME<sub>3-5</sub> for the worst-case scenario. OME<sub>3-5</sub> is produced via the MeOH DEHY route. The carbon footprint of the carbon uptake due to CO<sub>2</sub> utilization is negative (light grey). Positive environmental impacts result from electricity supply (yellow), heat supply (red), hydrogen supply (dark blue), direct CO<sub>2</sub> emissions in purge gases from OME<sub>3-5</sub> production (black), diesel production (brown), fuel combustion (light blue), and other environmental impacts due to process water supply and wastewater treatment (dark grey).

### S4 Well-to-wheel: the entire life cycle of diesel-OME<sub>3-5</sub> blends (best-case scenario with CO<sub>2</sub> from direct air capture)

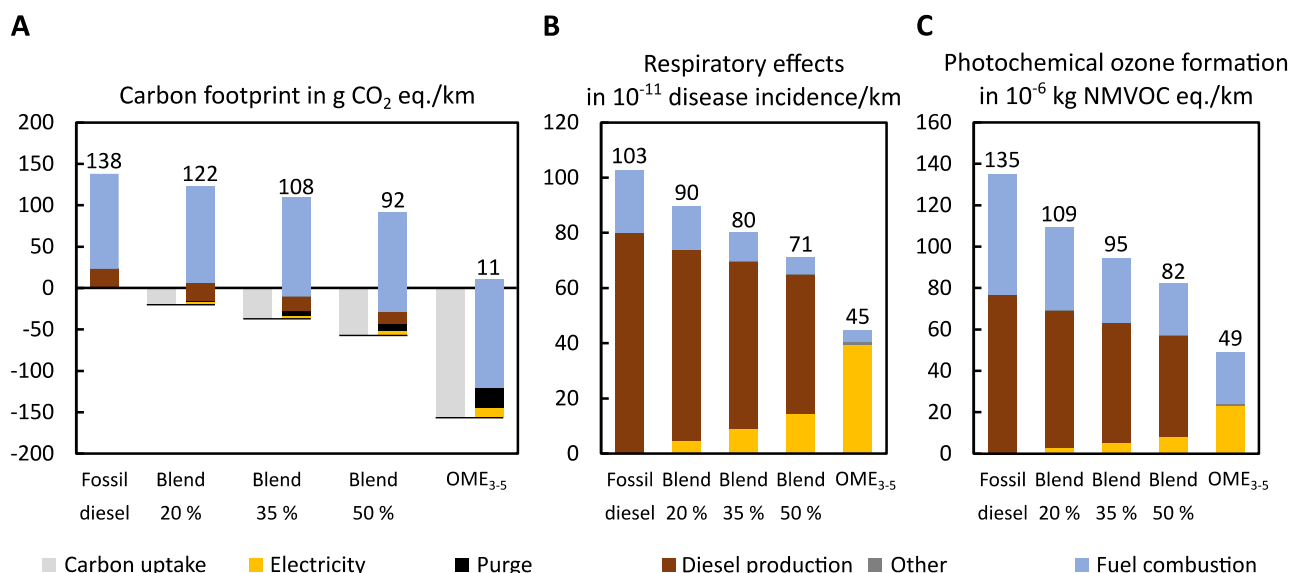

Figure S4: Well-to-wheel (A) carbon footprint in g CO<sub>2</sub> eq. per km, (B) respiratory effects in 10<sup>-11</sup> disease incidence per km, and (C) photochemical ozone formation in 10<sup>-6</sup> kg NMVOC eq. per km of pure fossil diesel, blends of OME<sub>3-5</sub> in fossil diesel, and pure OME<sub>3-5</sub> for the best-case scenario but now with CO<sub>2</sub> from direct air capture. OME<sub>3-5</sub> is produced via the MeOH DEHY route. The carbon footprint of the carbon uptake due to CO<sub>2</sub> utilization is negative (light grey). Positive environmental impacts result from electricity supply (yellow), direct CO<sub>2</sub> emissions in purge gases from OME<sub>3-5</sub> production (black), diesel production (brown), fuel combustion (light blue), and minor emissions due to process water supply and wastewater treatment (dark grey).

## S5 Blending OME<sub>3-5</sub> gradually into a fleet

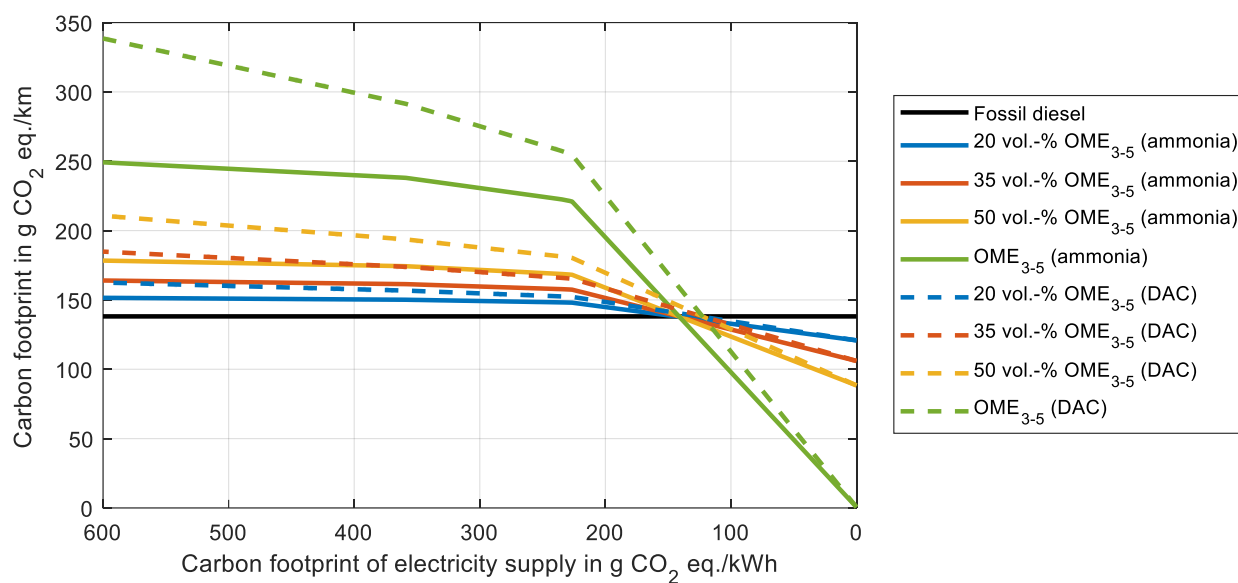

Figure S5: The well-to-wheel carbon footprint as function of the carbon footprint of electricity supply for pure OME<sub>3-5</sub>, blends of 20, 35, and 50 vol.-% OME<sub>3-5</sub> in diesel as well as pure fossil diesel. Results are shown for CO<sub>2</sub> from an ammonia plant (solid curves) and for CO<sub>2</sub> from direct air capture (dashed curves). The well-to-wheel impacts include emissions along the entire life cycle of diesel-OME<sub>3-5</sub> blends.

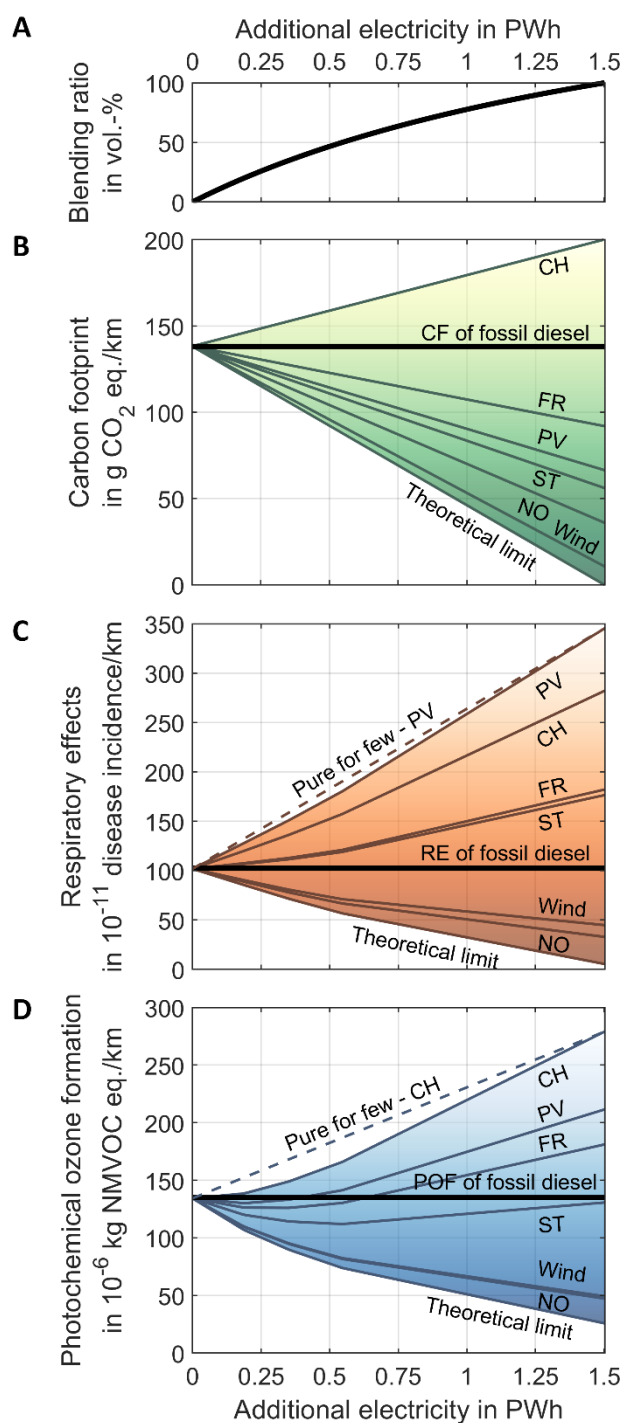

Figure S6: (A) The volumetric blending ratio, the well-to-wheel (B) carbon footprint (CF), (C) respiratory effects (RE), and (D) photochemical ozone formation (POF) as function of additionally available electricity for OME<sub>3-5</sub> production. Results are presented for country- and technology-specific environmental impacts of electricity. Solid curves indicate the environmental impacts of blending OME<sub>3-5</sub> with fossil diesel for the entire fleet ("blend for all"), while dashed lines show the results for switching only some diesel passenger cars to pure OME<sub>3-5</sub> usage ("pure for few"). "Pure for few" is the linear combination of pure diesel and pure OME<sub>3-5</sub> and is, for the sake of better readability, shown for only two examples. The black bold lines indicate the environmental impacts of pure fossil diesel for reference. CO<sub>2</sub> is supplied by direct air capture. CH: Switzerland, FR: France, NO: Norway, PV: photovoltaic, and ST: solar-thermal. The theoretical limit of a burden-free electricity supply is also included as lower bound.

## S6 Life cycle inventories

In this section, life cycle inventories (LCI) of all OME<sub>3-5</sub> production routes and the life cycle assessment (LCA) datasets for the background system are presented. LCIs for OME<sub>3-5</sub> production routes are shown as modified for our analyses and as heat-integrated. Heat integrations have been performed or recalculated, where necessary due to our modifications (cf. Section 3 in the manuscript).

### Characteristics of anhydrous and aqueous OME<sub>3-5</sub> routes

Dependent on whether water coexists in the final process step of OME<sub>3-5</sub> formation, OME<sub>3-5</sub> routes can be divided into two types: anhydrous and aqueous routes (cf. Figure 2 in the manuscript). In the aqueous routes, the production of water during OME<sub>3-5</sub> production is disadvantageous. First, it lowers the OME<sub>3-5</sub> yield as undesired side products are formed <sup>1</sup> and equilibrium conversion is shifted towards the reactants. <sup>2</sup> Second, water complicates product separation due to similar physio-chemical properties between water and OME<sub>2</sub> and the formation of azeotropes. <sup>3</sup> Promising solutions for water removal, e.g., membranes, are however in investigation. <sup>4</sup> An advantage of the aqueous routes is the direct use of methanol and formaldehyde (FA) for the production of OME<sub>3-5</sub>. The anhydrous routes are advantageous as water is absent during OME<sub>3-5</sub> formation, making both the reaction and the separation of the final product less complicated. However, a water-free FA source, e.g., trioxane or anhydrous FA, is required, whose production is energy-intensive. <sup>5</sup>

### Consistency in the underlying modelling assumptions for the considered OME<sub>3-5</sub> routes

Using data from different authors in a comparative study requires thorough consideration of consistency in the underlying modelling assumptions. Given the following model characteristics, we can conclude that the assumptions of the different process models are similar enough for a comparison. For the reactor models, we used detailed kinetic models where available (methanol, formaldehyde via partial oxidation of methanol, OME<sub>1</sub>, OME<sub>3-5</sub> from trioxane and OME<sub>1</sub>, and OME<sub>3-5</sub> from methanol and formaldehyde). Where no detailed kinetic models were available, we used either industrial data (trioxane), experimental data (formaldehyde via dehydrogenation of methanol), or equilibrium-based models if the process is experimentally or industrially close to equilibrium (DME, and OME<sub>3-5</sub> from trioxane and DME). For distillation columns, tray-to-tray RadFrac models were used everywhere. Overall, the thermodynamic models are based on the work of one research group (Maurer, Albert, Hasse, and Burger), which again speaks for a certain consistency between the models. Finally, for all routes, we recalculated or calculated for the first time, where not yet done in literature, pinch-based heat integration to further improve comparability between the routes.

### Anhydrous OME<sub>3-5</sub> route via trioxane and OME<sub>1</sub> (TRI+OME<sub>1</sub>)

Trioxane is the most common intermediate for anhydrous OME<sub>3-5</sub> production. It is commonly produced industrially from aqueous FA with a low FA conversion of approximately 5 % catalyzed by sulfuric acid. <sup>6</sup> To achieve a high overall trioxane yield, high recycle streams are necessary, which result in a high energy demand for separation both

by pure distillation <sup>6</sup> and by the conventional but more complex extractive distillation. <sup>7</sup> The capping source for anhydrous OME<sub>3-5</sub> production can either be OME<sub>1</sub> or dimethyl ether (DME) (cf. Figure 2 in the manuscript).

OME<sub>3-5</sub> production via trioxane and OME<sub>1</sub> (TRI+OME<sub>1</sub>) is the most well-known anhydrous route. OME<sub>1</sub> can be produced from methanol and aqueous FA using established process concepts with an acidic catalyst and a reactive pressure-swing distillation. <sup>8</sup> In OME<sub>3-5</sub> formation, trioxane first decomposes over an acidic catalyst to molecular FA, which is then incorporated into OME<sub>n-1</sub>. <sup>9</sup> An alternative mechanism is the direct incorporation of trioxane into OME<sub>n-3</sub>. A high selectivity towards OME<sub>3-5</sub> of approximately 70 % can be achieved and its purification via rectification requires only little energy. <sup>10-14</sup>

*Table S1: Life cycle inventory of methanol production<sup>15</sup> for the anhydrous route via trioxane and OME<sub>1</sub> (TRI+OME<sub>1</sub>) with full heat integration per kg of OME<sub>3-5</sub>.*

| Flow                    | Value  | Unit |
|-------------------------|--------|------|
| In                      |        |      |
| H <sub>2</sub>          | -0.249 | kg   |
| CO <sub>2</sub>         | -1.816 | kg   |
| Air                     | -0.676 | kg   |
| Electricity             | -1.270 | MJ   |
| Out                     |        |      |
| Methanol                | 1.272  | kg   |
| Exhaust                 | 0.746  | kg   |
| thereof CO <sub>2</sub> | 0.065  | kg   |

*Table S2: Life cycle inventory of formaldehyde production<sup>15</sup> for the anhydrous route via trioxane and OME<sub>1</sub> (TRI+OME<sub>1</sub>) with full heat integration per kg of OME<sub>3-5</sub>.*

| Flow                        | Value  | Unit |
|-----------------------------|--------|------|
| In                          |        |      |
| Methanol                    | -0.850 | kg   |
| Water                       | -0.318 | kg   |
| Water, solvent              | -0.080 | kg   |
| Air                         | -2.275 | kg   |
| Electricity                 | -0.155 | MJ   |
| Out                         |        |      |
| Formaldehyde, aq (50 wt.-%) | 1.446  | kg   |
| Exhaust                     | 2.078  | kg   |
| thereof CO <sub>2</sub>     | 0.103  | kg   |

Table S3: Life cycle inventory of OME<sub>1</sub> production<sup>15</sup> for the anhydrous route via trioxane and OME<sub>1</sub> (TRI+OME<sub>1</sub>) with full heat integration per kg of OME<sub>3-5</sub>.

| Flow                        | Value  | Unit |
|-----------------------------|--------|------|
| In                          |        |      |
| Methanol                    | -0.422 | kg   |
| Formaldehyde, aq (50 wt.-%) | -0.394 | kg   |
| Air                         | -0.338 | kg   |
| Electricity                 | -0.001 | MJ   |
| Out                         |        |      |
| OME <sub>1</sub>            | 0.484  | kg   |
| Wastewater                  | 0.316  | kg   |
| Exhaust                     | 0.355  | kg   |
| thereof CO <sub>2</sub>     | 0.028  | kg   |

Table S4: Life cycle inventory of trioxane production<sup>16</sup> for the anhydrous route via trioxane and OME<sub>1</sub> (TRI+OME<sub>1</sub>) with full heat integration per kg of OME<sub>3-5</sub>.

| Flow                        | Value   | Unit |
|-----------------------------|---------|------|
| In                          |         |      |
| Formaldehyde, aq (50 wt.-%) | -1.052  | kg   |
| Electricity                 | -1.036  | MJ   |
| Heat at 93°C                | -13.265 | MJ   |
| Heat at 128°C               | -5.165  | MJ   |
| Out                         |         |      |
| Trioxane                    | 0.515   | kg   |
| Wastewater                  | 0.536   | kg   |

Table S5: Life cycle inventory of OME<sub>3-5</sub> production<sup>16</sup> for the anhydrous route via trioxane and OME<sub>1</sub> (TRI+OME<sub>1</sub>) with full heat integration per kg of OME<sub>3-5</sub>.

| Flow               | Value  | Unit |
|--------------------|--------|------|
| In                 |        |      |
| OME <sub>1</sub>   | -0.484 | kg   |
| Trioxane           | -0.515 | kg   |
| Out                |        |      |
| OME <sub>3-5</sub> | 1.000  | kg   |

#### Anhydrous OME<sub>3-5</sub> route via trioxane and DME (TRI+DME)

The advantage of producing OME<sub>3-5</sub> via trioxane and DME (TRI+DME) is the more direct access to DME from H<sub>2</sub> and CO<sub>2</sub> compared to OME<sub>1</sub>. Thereby, the methanol and FA production plants are only needed for trioxane production and can thus be smaller. DME can be produced directly from H<sub>2</sub> and CO<sub>2</sub><sup>17</sup> in a one-step process without producing methanol as an intermediate.<sup>18</sup> For OME<sub>3-5</sub> production from trioxane and DME, a higher energy demand is reported compared to OME<sub>3-5</sub> production from trioxane and OME<sub>1</sub>, while the production of DME is highlighted as cheaper compared to OME<sub>1</sub>.<sup>19</sup>



Table S6: Life cycle inventory of methanol production<sup>15</sup> for the anhydrous route via trioxane and DME (TRI+DME) with full heat integration per kg of OME<sub>3-5</sub>.

| Flow                    | Value  | Unit |
|-------------------------|--------|------|
| In                      |        |      |
| H <sub>2</sub>          | -0.169 | kg   |
| CO <sub>2</sub>         | -1.227 | kg   |
| Air                     | -0.457 | kg   |
| Electricity             | -0.858 | MJ   |
| Out                     |        |      |
| Methanol                | 0.860  | kg   |
| Exhaust                 | 0.504  | kg   |
| thereof CO <sub>2</sub> | 0.044  | kg   |

Table S7: Life cycle inventory of formaldehyde production<sup>15</sup> for the anhydrous route via trioxane and DME (TRI+DME) with full heat integration per kg of OME<sub>3-5</sub>.

| Flow                        | Value  | Unit |
|-----------------------------|--------|------|
| In                          |        |      |
| Methanol                    | -0.860 | kg   |
| Water                       | -0.322 | kg   |
| Water, solvent              | -0.081 | kg   |
| Air                         | -2.301 | kg   |
| Electricity                 | -0.157 | MJ   |
| Out                         |        |      |
| Formaldehyde, aq (50 wt.-%) | 1.463  | kg   |
| Exhaust                     | 2.102  | kg   |
| thereof CO <sub>2</sub>     | 0.104  | kg   |

Table S8: Life cycle inventory of DME production<sup>20</sup> for the anhydrous route via trioxane and DME (TRI+DME) with full heat integration per kg of OME<sub>3-5</sub>.

| Flow                    | Value  | Unit |
|-------------------------|--------|------|
| In                      |        |      |
| H <sub>2</sub>          | -0.076 | kg   |
| CO <sub>2</sub>         | -0.552 | kg   |
| Air                     | -0.091 | kg   |
| Electricity             | -0.409 | MJ   |
| Out                     |        |      |
| DME                     | 0.284  | kg   |
| Wastewater              | 0.334  | kg   |
| Exhaust                 | 0.101  | kg   |
| thereof CO <sub>2</sub> | 0.009  | kg   |

Table S9: Life cycle inventory of trioxane production<sup>16</sup> for the anhydrous route via trioxane and DME (TRI+DME) with full heat integration per kg of OME<sub>3-5</sub>.

| Flow                        | Value   | Unit |
|-----------------------------|---------|------|
| In                          |         |      |
| Formaldehyde, aq (50 wt.-%) | -1.463  | kg   |
| Electricity                 | -1.440  | MJ   |
| Heat at 93°C                | -15.627 | MJ   |
| Heat at 128°C               | -9.772  | MJ   |
| Out                         |         |      |
| Trioxane                    | 0.716   | kg   |
| Wastewater                  | 0.745   | kg   |

Table S10: Life cycle inventory of OME<sub>3-5</sub> production<sup>19</sup> for the anhydrous route via trioxane and DME (TRI+DME) with full heat integration per kg of OME<sub>3-5</sub>.

| Flow               | Value  | Unit |
|--------------------|--------|------|
| In                 |        |      |
| DME                | -0.284 | kg   |
| Trioxane           | -0.716 | kg   |
| Out                |        |      |
| OME <sub>3-5</sub> | 1.000  | kg   |

#### Aqueous OME<sub>3-5</sub> route via methanol and formaldehyde by partial oxidation of methanol (MeOH POX)

In contrast to the anhydrous routes, aqueous routes directly utilize methanol and typically aqueous FA for OME<sub>3-5</sub> formation (cf. Figure 2 in the manuscript). In addition to the complex oligomerization reactions in methanolic and aqueous FA solutions, which take place without the presence of a catalyst,<sup>21</sup> the desired formation of OME<sub>n</sub> takes place in the presence of an acidic catalyst accompanied by water formation following etherification reactions.<sup>22</sup> The alternative chain-growth mechanism of OME<sub>1</sub> towards OME<sub>n</sub> is the direct incorporation of FA into OME<sub>n-1</sub>. Irrespective of the mechanism, water is present in the system. However, the amount of water and thus the type of FA source may have a huge influence on the performance of the OME<sub>3-5</sub> production.

Commercial FA production takes place via partial oxidation of methanol (FORMOX process) or combined partial oxidation and dehydrogenation of methanol (BASF process).<sup>5</sup> In the BASF process, co-produced H<sub>2</sub> is burned for power generation since it is diluted in the remaining off-gas. For both processes, the overall reaction stoichiometry is the same and the resulting FA concentration in the aqueous solution is up to 55 wt.-%.<sup>5</sup> To increase the FA concentration, a subsequent falling-film evaporator can be used as it has been applied in Held *et al.*<sup>23</sup> Due to a lower heat demand and favorable economics, the BASF process is considered in this study (MeOH POX).<sup>5</sup> Therein, methanol reacts with air completely to FA and small amounts of side products (CO<sub>2</sub>, CO, and H<sub>2</sub>). Water is added to the reactor to avoid explosive mixture compositions and is further added as a solvent in the subsequent absorber, yielding the desired aqueous FA solution.

Table S11: Life cycle inventory of methanol production<sup>23</sup> for the aqueous route via methanol and formaldehyde by partial oxidation of methanol (MeOH POX) with full heat integration per kg of OME<sub>3-5</sub>.

| Flow                    | Value  | Unit |
|-------------------------|--------|------|
| In                      |        |      |
| H <sub>2</sub>          | -0.250 | kg   |
| CO <sub>2</sub>         | -1.829 | kg   |
| Air                     | -1.018 | kg   |
| Electricity             | -1.400 | MJ   |
| Out                     |        |      |
| Methanol                | 1.252  | kg   |
| Wastewater              | 0.720  | kg   |
| Exhaust                 | 1.134  | kg   |
| thereof CO <sub>2</sub> | 0.113  | kg   |

Table S12: Life cycle inventory of formaldehyde production<sup>23</sup> for the aqueous route via methanol and formaldehyde by partial oxidation of methanol (MeOH POX) with full heat integration per kg of OME<sub>3-5</sub>.

| Flow                        | Value  | Unit |
|-----------------------------|--------|------|
| In                          |        |      |
| Methanol                    | -0.835 | kg   |
| Water                       | -0.241 | kg   |
| Air                         | -1.491 | kg   |
| Electricity                 | -0.043 | MJ   |
| Out                         |        |      |
| Formaldehyde, aq (85 wt.-%) | 0.824  | kg   |
| Wastewater                  | 0.449  | kg   |
| Exhaust                     | 1.294  | kg   |
| thereof CO <sub>2</sub>     | 0.121  | kg   |

Table S13: Life cycle inventory of OME<sub>3-5</sub> production<sup>23</sup> for the aqueous route via methanol and formaldehyde by partial oxidation of methanol (MeOH POX) with full heat integration per kg of OME<sub>3-5</sub>.

| Flow                        | Value  | Unit |
|-----------------------------|--------|------|
| In                          |        |      |
| Formaldehyde, aq (85 wt.-%) | -0.824 | kg   |
| Methanol                    | -0.417 | kg   |
| Heat at 143°C               | -0.597 | MJ   |
| Out                         |        |      |
| OME <sub>3-5</sub>          | 1.000  | kg   |
| Wastewater                  | 0.241  | kg   |

#### Aqueous OME<sub>3-5</sub> route via methanol and formaldehyde by dehydrogenation of methanol (MeOH DEHY)

The prominent advantage of methanol dehydrogenation (MeOH DEHY) compared to partial oxidation is the significant co-production of H<sub>2</sub> instead of water. This H<sub>2</sub> can be used for the preceding methanol production to lower the overall electricity demand for the entire *Power-to-Fuel* process. However, in contrast to the exothermic BASF process, FA production via dehydrogenation of methanol is an endothermic reaction that requires heating at reactor temperatures of 450-900 °C.<sup>24</sup> Selective and active catalysts have already been identified resulting in a high single-pass FA yield of over 70 %.<sup>24,25</sup> In this study, we assume a copper/zinc/selenium catalyst achieving a methanol

conversion of 69 % and FA selectivity of 90 %, resulting in a yield of 62.1 % at 650 °C reactor temperature. <sup>26</sup> Small amounts of CO and CH<sub>4</sub> are formed as side products. These experimental results have been achieved by methanol dilution with H<sub>2</sub> in the ratio of 1:1 in the reactor feed.

*Table S14: Life cycle inventory of methanol production<sup>23</sup> for the aqueous route via methanol and formaldehyde by dehydrogenation of methanol (MeOH DEHY) with full heat integration per kg of OME<sub>3-5</sub>.*

| Flow                    | Value  | Unit |
|-------------------------|--------|------|
| In                      |        |      |
| H <sub>2</sub>          | -0.259 | kg   |
| CO <sub>2</sub>         | -1.898 | kg   |
| Air                     | -1.056 | kg   |
| Electricity             | -1.400 | MJ   |
| Out                     |        |      |
| Methanol                | 1.299  | kg   |
| Wastewater              | 0.747  | kg   |
| Exhaust                 | 1.176  | kg   |
| thereof CO <sub>2</sub> | 0.118  | kg   |

*Table S15: Life cycle inventory of formaldehyde production<sup>24-26</sup> for the aqueous route via methanol and formaldehyde by dehydrogenation of methanol (MeOH DEHY) with full heat integration per kg of OME<sub>3-5</sub>.*

| Flow                                            | Value  | Unit |
|-------------------------------------------------|--------|------|
| In                                              |        |      |
| Methanol                                        | -1.299 | kg   |
| Water                                           | -0.152 | kg   |
| Air                                             | -2.550 | kg   |
| Electricity                                     | -0.637 | MJ   |
| Heat at 650°C                                   | -2.135 | MJ   |
| Out                                             |        |      |
| Formaldehyde/Methanol/Water<br>(56/34/10 wt.-%) | 1.241  | kg   |
| H <sub>2</sub>                                  | 0.055  | kg   |
| Exhaust                                         | 2.705  | kg   |
| thereof CO <sub>2</sub>                         | 0.186  | kg   |

*Table S16: Life cycle inventory of OME<sub>3-5</sub> production<sup>23</sup> for the aqueous route via methanol and formaldehyde by dehydrogenation of methanol (MeOH DEHY) with full heat integration per kg of OME<sub>3-5</sub>.*

| Flow                                            | Value  | Unit |
|-------------------------------------------------|--------|------|
| In                                              |        |      |
| Formaldehyde/Methanol/Water<br>(56/34/10 wt.-%) | -1.241 | kg   |
| Heat at 197°C                                   | -3.279 | MJ   |
| Out                                             |        |      |
| OME <sub>3-5</sub>                              | 1.000  | kg   |
| Wastewater                                      | 0.241  | kg   |

## LCA datasets for the background system

Table S17: LCA datasets for the background system.

| Flow                  | Dataset                                                                | Region              | Reference                                 |
|-----------------------|------------------------------------------------------------------------|---------------------|-------------------------------------------|
| Wastewater            | treatment of wastewater, average, capacity 1E9l/year                   | Europe <sup>c</sup> | ecoinvent 3.7 cut-off <sup>27</sup>       |
| Water                 | Water (desalinated; deionised) ts                                      | EU-28               | GaBi <sup>28</sup>                        |
| Diesel                | Diesel mix at filling station ts                                       | EU-28               | GaBi <sup>28</sup>                        |
| Electricity           | Electricity grid mix (average power plants) ts <sup>a</sup>            | EU-28               | GaBi <sup>28</sup>                        |
|                       | Electricity from wind power ts <sup>b</sup>                            | EU-28               | GaBi <sup>28</sup>                        |
|                       | Electricity from photovoltaic ts                                       | EU-28               | GaBi <sup>28</sup>                        |
|                       | Electricity from solar thermal ts                                      | EU-28               | GaBi <sup>28</sup>                        |
|                       | Electricity grid mix ts                                                | DE                  | GaBi <sup>28</sup>                        |
|                       | Electricity grid mix ts                                                | IT                  | GaBi <sup>28</sup>                        |
|                       | Electricity grid mix ts                                                | DK                  | GaBi <sup>28</sup>                        |
|                       | Electricity grid mix ts                                                | AT                  | GaBi <sup>28</sup>                        |
|                       | Electricity grid mix ts                                                | FI                  | GaBi <sup>28</sup>                        |
|                       | Electricity grid mix ts                                                | BE                  | GaBi <sup>28</sup>                        |
|                       | Electricity grid mix ts                                                | CH                  | GaBi <sup>28</sup>                        |
|                       | Electricity grid mix ts                                                | FR                  | GaBi <sup>28</sup>                        |
|                       | Electricity grid mix ts                                                | NO                  | GaBi <sup>28</sup>                        |
| Heat below 90°C       | steam production, as energy carrier, in chemical industry <sup>a</sup> | Europe              | ecoinvent 3.7 cut-off <sup>27</sup>       |
|                       | Heat pump (COP = 3.28) <sup>b,d</sup>                                  | –                   | David <i>et al.</i> <sup>29</sup>         |
| Heat between 90-250°C | steam production, as energy carrier, in chemical industry <sup>a</sup> | Europe              | ecoinvent 3.7 cut-off <sup>27</sup>       |
|                       | Electrode boiler ( $\eta = 0.95$ ) <sup>b</sup>                        | –                   | Müller <i>et al.</i> <sup>30</sup>        |
| Heat above 250°C      | Thermal energy from natural gas ts <sup>a</sup>                        | EU-28               | GaBi <sup>28</sup>                        |
|                       | Electrode boiler ( $\eta = 0.95$ ) <sup>b</sup>                        | –                   | Müller <i>et al.</i> <sup>30</sup>        |
| Hydrogen              | Hydrogen (steam reforming from natural gas) ts <sup>a</sup>            | DE                  | GaBi <sup>28</sup>                        |
|                       | PEM electrolysis <sup>b</sup>                                          | –                   | Reuß <i>et al.</i> <sup>31</sup>          |
| Carbon dioxide        | CO <sub>2</sub> from direct air capture <sup>a</sup>                   | –                   | Deutz <i>et al.</i> <sup>32</sup>         |
|                       | CO <sub>2</sub> from ammonia plant <sup>b,e</sup>                      | –                   | von der Assen <i>et al.</i> <sup>33</sup> |

<sup>a</sup> Worst-case scenario.

<sup>b</sup> Best-case scenario.

<sup>c</sup> Without Switzerland.

<sup>d</sup> Averaged coefficient of performance (COP) of heat pumps built beyond 2006 with  $T_{\text{source}} = 9\text{--}15^\circ\text{C}$  and  $T_{\text{operate}} = 90^\circ\text{C}$  from David *et al.*<sup>29</sup>.

<sup>e</sup> Without electricity consumption for compressing CO<sub>2</sub> to 100 bar for transportation: The OME<sub>3-5</sub> production routes of this study demand CO<sub>2</sub> at 1 bar and include the CO<sub>2</sub> compression intrinsically in their system boundaries.

## S7 Exergy efficiency and specific exergies

The exergy efficiency is calculated as the share of all exergy output flows divided by all exergy input flows:

$$\eta_{\text{Exergy}} = \frac{\dot{E}_{\text{OME}_{3-5}}}{\dot{E}_{\text{H}_2} + \dot{E}_{\dot{Q}_{\text{in}}} + P_{\text{el}}}.$$

$\dot{E}_{\text{OME}_{3-5}}$ ,  $\dot{E}_{\text{H}_2}$ , and  $\dot{E}_{\dot{Q}_{\text{in}}}$  denote the exergy flows associated with the flows of OME<sub>3-5</sub>, H<sub>2</sub>, and the net heat demand  $\dot{Q}_{\text{in}}$ , while  $P_{\text{el}}$  represents the electricity consumption of the OME<sub>3-5</sub> production system. The net heat demand  $\dot{Q}_{\text{in}}$  is calculated by pinch-based heat integration. Here, CO<sub>2</sub> is not shown as exergy input flow since it brings negligible exergy into the system at 1 bar and 298 K.

Table S18: Specific exergies of considered mass and heat flows. The state of each component is denoted as follows: g for gaseous and l for liquid.

| Component                                        | State | Pressure in bar | Temperature in K | Value  |
|--------------------------------------------------|-------|-----------------|------------------|--------|
| Exergy of mass flows in MJ <sub>Exergy</sub> /kg |       |                 |                  |        |
| H <sub>2</sub>                                   | g     | 30              | 298              | 121.83 |
| CO <sub>2</sub>                                  | g     | 1               | 298              | 0.00   |
| Methanol                                         | l     | 1               | 298              | 21.93  |
| Formaldehyde <sup>a</sup>                        | l     | 1               | 298              | 8.36   |
| Formaldehyde <sup>b</sup>                        | l     | 1               | 298              | 14.35  |
| Trioxane                                         | l     | 1               | 368              | 17.24  |
| DME                                              | l     | 10              | 298              | 30.21  |
| OME <sub>1</sub>                                 | l     | 1               | 298              | 25.01  |
| OME <sub>3</sub>                                 | l     | 1               | 298              | 21.42  |
| OME <sub>4</sub>                                 | l     | 1               | 298              | 20.78  |
| OME <sub>5</sub>                                 | l     | 1               | 298              | 20.23  |
| OME <sub>3-5</sub> <sup>c</sup>                  | l     | 1               | 298              | 20.91  |
| OME <sub>3-5</sub> <sup>d</sup>                  | l     | 1               | 298              | 20.97  |
| OME <sub>3-5</sub> <sup>e</sup>                  | l     | 1               | 298              | 20.80  |
| FA/Methanol/H <sub>2</sub> O<br>(56/34/10 wt.-%) | l     | 1               | 368              | 17.27  |
| Exergy of heat flows in MJ <sub>Exergy</sub> /MJ |       |                 |                  |        |
| Trioxane production (93°C)                       |       |                 | 366              | 0.19   |
| Trioxane production (128°C)                      |       |                 | 401              | 0.26   |
| OME <sub>3-5</sub> production (143°C)            |       |                 | 416              | 0.28   |
| OME <sub>3-5</sub> production (197°C)            |       |                 | 470              | 0.37   |
| Formaldehyde production (650°C)                  |       |                 | 923              | 0.68   |

<sup>a</sup> 50 wt.-% aq.

<sup>b</sup> 85 wt.-% aq.

<sup>c</sup> Mixture of Burger *et al.*:<sup>34</sup> 42.88 % OME<sub>3</sub>, 33.77 % OME<sub>4</sub>, 23.35 % OME<sub>5</sub>.

<sup>d</sup> Mixture of Held *et al.*:<sup>23</sup> 49.89 % OME<sub>3</sub>, 30.69 % OME<sub>4</sub>, 19.39 % OME<sub>5</sub>.

<sup>e</sup> Mixture of Breitzkreuz *et al.*:<sup>19</sup> 33.69 % OME<sub>3</sub>, 34.30 % OME<sub>4</sub>, 32.01 % OME<sub>5</sub>.

## S8 Exergy balances

Using the inventories in Section S6 and the specific exergies in Section S7, we can directly compute the exergy flow rates entering and leaving the processes in the considered production routes. The only point that requires additional attention are the heat flows.

For the LCA as well as for computing the overall exergy efficiency of the production routes, we consider full heat integration along the entire production route. This means that any hot and cold stream from each process step (e.g., methanol production, formaldehyde production, OME<sub>3-5</sub> production) can be matched with any other cold and hot stream, including streams from other process steps. As such, we only get an overall heat demand for each production route. Since we performed heat integration only by pinch analysis, we just know how much external heating and cooling is required for the entire production route, but we do not know how much heat is transferred within each process step and from one process step to another. While this overall heat demand is sufficient to compute the LCA indicators and the overall exergy efficiency, it does not allow us to obtain exergy balances (or, more specifically, the exergy of heat flows) for each individual process step (e.g., methanol production only).

Nevertheless, we still want to be able to calculate approximate exergy balances for each individual process step in order to visualize the main exergy flows and losses. To do so, we derive an estimate for the heat transfer between the individual process steps as follows. We conduct heat integration by pinch analysis individually for each process step, which gives us an estimate for the required external heating and cooling of each process step as well as the associated temperature levels. We can then approximately match high-enough temperature cooling demand of one process step with lower-temperature heating demand of another process step. This type of heat integration is more restricted than the full heat integration, allowing matches between any two streams considered above. Therefore, it does not yield exactly the same results, but a rough estimate for the heat flows that are exchanged between the process steps.

The resulting exergy balances are given in the following tables.

### Anhydrous route via trioxane and OME<sub>1</sub> (TRI+OME<sub>1</sub>)

Table S19: Exergy balance of methanol production<sup>15</sup> for the anhydrous route via trioxane and OME<sub>1</sub> (TRI+OME<sub>1</sub>). Exergy flows are given for 1 kg of OME<sub>3-5</sub>.

| Exergy flow                                    | Value  | Unit |
|------------------------------------------------|--------|------|
| In                                             |        |      |
| H <sub>2</sub>                                 | -30.40 | MJ   |
| Electricity                                    | -1.27  | MJ   |
| Out                                            |        |      |
| Methanol                                       | 27.89  | MJ   |
| Heat export to OME <sub>1</sub> at 155°C       | 0.15   | MJ   |
| Heat export to OME <sub>3-5</sub> at 250/200°C | 1.01   | MJ   |
| Loss                                           | 2.62   | MJ   |

Table S20: Exergy balance of formaldehyde production<sup>15</sup> for the anhydrous route via trioxane and OME<sub>1</sub> (TRI+OME<sub>1</sub>). Exergy flows are given for 1 kg of OME<sub>3-5</sub>.

| Exergy flow                              | Value  | Unit |
|------------------------------------------|--------|------|
| In                                       |        |      |
| Methanol                                 | -18.64 | MJ   |
| Electricity                              | -0.16  | MJ   |
| Out                                      |        |      |
| Formaldehyde, aq (50 wt.-%)              | 12.08  | MJ   |
| Heat export to OME <sub>1</sub> at 200°C | 0.92   | MJ   |
| Heat export to trioxane at 200°C         | 0.74   | MJ   |
| Loss                                     | 5.06   | MJ   |

Table S21: Exergy balance of OME<sub>1</sub> production<sup>15</sup> for the anhydrous route via trioxane and OME<sub>1</sub> (TRI+OME<sub>1</sub>). Exergy flows are given for 1 kg of OME<sub>3-5</sub>.

| Exergy flow                                  | Value | Unit |
|----------------------------------------------|-------|------|
| In                                           |       |      |
| Methanol                                     | -9.25 | MJ   |
| Formaldehyde, aq (50 wt.-%)                  | -3.29 | MJ   |
| Heat import from methanol at 155°C           | -0.15 | MJ   |
| Heat import from formaldehyde at 200°C       | -0.92 | MJ   |
| Heat import from OME <sub>3-5</sub> at 110°C | -0.24 | MJ   |
| Electricity                                  | -0.00 | MJ   |
| Out                                          |       |      |
| OME <sub>1</sub>                             | 12.11 | MJ   |
| Loss                                         | 1.74  | MJ   |



Table S22: Exergy balance of trioxane production<sup>16</sup> for the anhydrous route via trioxane and OME<sub>1</sub> (TRI+OME<sub>1</sub>). Exergy flows are given for 1 kg of OME<sub>3-5</sub>.

| Exergy flow                            | Value | Unit |
|----------------------------------------|-------|------|
| In                                     |       |      |
| Formaldehyde, aq (50 wt.-%)            | -8.79 | MJ   |
| Heat import from formaldehyde at 200°C | -0.74 | MJ   |
| Heat at 93°C                           | -2.46 | MJ   |
| Heat at 128°C                          | -1.33 | MJ   |
| Electricity                            | -1.04 | MJ   |
| Out                                    |       |      |
| Trioxane                               | 8.88  | MJ   |
| Loss                                   | 5.48  | MJ   |

Table S23: Exergy balance of OME<sub>3-5</sub> production<sup>16</sup> for the anhydrous route via trioxane and OME<sub>1</sub> (TRI+OME<sub>1</sub>). Exergy flows are given for 1 kg of OME<sub>3-5</sub>.

| Exergy flow                              | Value  | Unit |
|------------------------------------------|--------|------|
| In                                       |        |      |
| OME <sub>1</sub>                         | -12.11 | MJ   |
| Trioxane                                 | -8.88  | MJ   |
| Heat import from methanol at 250/200°C   | -1.01  | MJ   |
| Out                                      |        |      |
| OME <sub>3-5</sub>                       | 20.91  | MJ   |
| Heat export to OME <sub>1</sub> at 110°C | 0.24   | MJ   |
| Loss                                     | 0.85   | MJ   |

### Anhydrous route via trioxane and DME (TRI+DME)

Table S24: Exergy balance of methanol production<sup>15</sup> for the anhydrous route via trioxane and DME (TRI+DME). Exergy flows are given for 1 kg of OME<sub>3-5</sub>.

| Exergy flow                      | Value  | Unit |
|----------------------------------|--------|------|
| In                               |        |      |
| H <sub>2</sub>                   | -20.55 | MJ   |
| Electricity                      | -0.86  | MJ   |
| Out                              |        |      |
| Methanol                         | 18.86  | MJ   |
| Heat export to trioxane at 185°C | 0.73   | MJ   |
| Loss                             | 1.82   | MJ   |

Table S25: Exergy balance of formaldehyde production<sup>15</sup> for the anhydrous route via trioxane and DME (TRI+DME). Exergy flows are given for 1 kg of OME<sub>3-5</sub>.

| Exergy flow                                | Value  | Unit |
|--------------------------------------------|--------|------|
| In                                         |        |      |
| Methanol                                   | -18.86 | MJ   |
| Electricity                                | -0.16  | MJ   |
| Out                                        |        |      |
| Formaldehyde, aq (50 wt.-%)                | 12.22  | MJ   |
| Heat export to trioxane at 200°C           | 1.02   | MJ   |
| Heat export to OME <sub>3-5</sub> at 300°C | 0.85   | MJ   |
| Loss                                       | 4.93   | MJ   |

Table S26: Exergy balance of DME production<sup>20</sup> for the anhydrous route via trioxane and DME (TRI+DME). Exergy flows are given for 1 kg of OME<sub>3-5</sub>.

| Exergy flow                      | Value | Unit |
|----------------------------------|-------|------|
| In                               |       |      |
| H <sub>2</sub>                   | -9.24 | MJ   |
| Electricity                      | -0.41 | MJ   |
| Out                              |       |      |
| DME                              | 8.58  | MJ   |
| Heat export to trioxane at 195°C | 0.16  | MJ   |
| Loss                             | 0.91  | MJ   |

Table S27: Exergy balance of trioxane production<sup>16</sup> for the anhydrous route via trioxane and DME (TRI+DME). Exergy flows are given for 1 kg of OME<sub>3-5</sub>.

| Exergy flow                            | Value  | Unit |
|----------------------------------------|--------|------|
| In                                     |        |      |
| Formaldehyde, aq (50 wt.-%)            | -12.22 | MJ   |
| Heat import from methanol at 185°C     | -0.73  | MJ   |
| Heat import from formaldehyde at 200°C | -1.02  | MJ   |
| Heat import from DME at 195°C          | -0.16  | MJ   |
| Heat at 93°C                           | -2.90  | MJ   |
| Heat at 128°C                          | -2.51  | MJ   |
| Electricity                            | -1.44  | MJ   |
| Out                                    |        |      |
| Trioxane                               | 12.34  | MJ   |
| Loss                                   | 8.64   | MJ   |

Table S28: Exergy balance of OME<sub>3-5</sub> production<sup>19</sup> for the anhydrous route via trioxane and DME (TRI+DME). Exergy flows are given for 1 kg of OME<sub>3-5</sub>.

| Exergy flow                            | Value  | Unit |
|----------------------------------------|--------|------|
| In                                     |        |      |
| DME                                    | -8.58  | MJ   |
| Trioxane                               | -12.34 | MJ   |
| Heat import from formaldehyde at 300°C | -0.85  | MJ   |
| Out                                    |        |      |
| OME <sub>3-5</sub>                     | 20.80  | MJ   |
| Loss                                   | 0.97   | MJ   |

### Aqueous route via methanol and formaldehyde by partial oxidation of methanol (MeOH POX)

Table S29: Exergy balance of methanol production<sup>23</sup> for the aqueous route via methanol and formaldehyde by partial oxidation of methanol (MeOH POX). Exergy flows are given for 1 kg of OME<sub>3-5</sub>.

| Exergy flow                                       | Value  | Unit |
|---------------------------------------------------|--------|------|
| In                                                |        |      |
| H <sub>2</sub>                                    | -30.47 | MJ   |
| Electricity                                       | -1.40  | MJ   |
| Out                                               |        |      |
| Methanol                                          | 27.45  | MJ   |
| Heat export to<br>OME <sub>3-5</sub> at 650/230°C | 1.54   | MJ   |
| Loss                                              | 2.88   | MJ   |

Table S30: Exergy balance of formaldehyde production<sup>23</sup> for the aqueous route via methanol and formaldehyde by partial oxidation of methanol (MeOH POX). Exergy flows are given for 1 kg of OME<sub>3-5</sub>.

| Exergy flow                                       | Value  | Unit |
|---------------------------------------------------|--------|------|
| In                                                |        |      |
| Methanol                                          | -18.31 | MJ   |
| Electricity                                       | -0.04  | MJ   |
| Out                                               |        |      |
| Formaldehyde, aq (85 wt.-%)                       | 11.83  | MJ   |
| Heat export to<br>OME <sub>3-5</sub> at 650/200°C | 2.79   | MJ   |
| Loss                                              | 3.73   | MJ   |

Table S31: Exergy balance of OME<sub>3-5</sub> production<sup>23</sup> for the aqueous route via methanol and formaldehyde by partial oxidation of methanol (MeOH POX). Exergy flows are given for 1 kg of OME<sub>3-5</sub>.

| Exergy flow                                      | Value  | Unit |
|--------------------------------------------------|--------|------|
| In                                               |        |      |
| Formaldehyde, aq (85 wt.-%)                      | -11.83 | MJ   |
| Methanol                                         | -9.14  | MJ   |
| Heat import from<br>methanol at 650/230°C        | -1.54  | MJ   |
| Heat import from<br>formaldehyde at<br>650/200°C | -2.79  | MJ   |
| Heat at 143°C                                    | -0.17  | MJ   |
| Out                                              |        |      |
| OME <sub>3-5</sub>                               | 20.97  | MJ   |
| Loss                                             | 4.50   | MJ   |

### Aqueous route via methanol and formaldehyde by dehydrogenation of methanol (MeOH DEHY)

Table S32: Exergy balance of methanol production<sup>23</sup> for the aqueous route via methanol and formaldehyde by dehydrogenation of methanol (MeOH DEHY). Exergy flows are given for 1 kg of OME<sub>3-5</sub>.

| Exergy flow                                       | Value  | Unit |
|---------------------------------------------------|--------|------|
| In                                                |        |      |
| H <sub>2</sub>                                    | -24.96 | MJ   |
| H <sub>2</sub> recycle<br>from formaldehyde       | -6.65  | MJ   |
| Electricity                                       | -1.40  | MJ   |
| Out                                               |        |      |
| Methanol                                          | 28.48  | MJ   |
| Heat export to<br>OME <sub>3-5</sub> at 650/200°C | 1.93   | MJ   |
| Loss                                              | 2.60   | MJ   |

Table S33: Exergy balance of formaldehyde production<sup>24-26</sup> for the aqueous route via methanol and formaldehyde by dehydrogenation of methanol (MeOH DEHY). Exergy flows are given for 1 kg of OME<sub>3-5</sub>.

| Exergy flow                                     | Value  | Unit |
|-------------------------------------------------|--------|------|
| In                                              |        |      |
| Methanol                                        | -28.48 | MJ   |
| Heat at 650°C                                   | -1.45  | MJ   |
| Electricity                                     | -0.64  | MJ   |
| Out                                             |        |      |
| Formaldehyde/Methanol/Water<br>(56/34/10 wt.-%) | 21.44  | MJ   |
| H <sub>2</sub> recycle<br>to methanol           | 6.65   | MJ   |
| Heat export to<br>OME <sub>3-5</sub> at 200°C   | 0.67   | MJ   |
| Loss                                            | 1.81   | MJ   |

Table S34: Exergy balance of OME<sub>3-5</sub> production<sup>23</sup> for the aqueous route via methanol and formaldehyde by dehydrogenation of methanol (MeOH DEHY). Exergy flows are given for 1 kg of OME<sub>3-5</sub>.

| Exergy flow                                     | Value  | Unit |
|-------------------------------------------------|--------|------|
| In                                              |        |      |
| Formaldehyde/Methanol/Water<br>(56/34/10 wt.-%) | -21.44 | MJ   |
| Heat import from<br>methanol at 650/200°C       | -1.93  | MJ   |
| Heat import from<br>formaldehyde at 200°C       | -0.67  | MJ   |
| Heat at 197°C                                   | -1.20  | MJ   |
| Out                                             |        |      |
| OME <sub>3-5</sub>                              | 20.97  | MJ   |
| Loss                                            | 4.27   | MJ   |

## S9 Emission measurement

Table S35: Specifications of the single-cylinder engine.

| Feature                    | Unit  | Value                                           |
|----------------------------|-------|-------------------------------------------------|
| Bore                       | mm    | 75                                              |
| Stroke                     | mm    | 88.3                                            |
| Displacement               | Liter | 0.39                                            |
| Compression ratio          | -     | 15:1                                            |
| Swirl number               | -     | 1.25                                            |
| Max. injection pressure    | bar   | 2000                                            |
| Max. boost pressure (abs.) | bar   | 4                                               |
| Peak firing pressure       | bar   | 220                                             |
| Max. engine speed          | 1/min | 5500                                            |
| Piston bowl geometry       | -     | Aluminum piston with $\omega$ -shaped reentrant |

Table S36: Measuring devices for species concentration, air mass flow, and fuel mass flow.

| Emission                                          | Measuring principle                         | Device                                 |
|---------------------------------------------------|---------------------------------------------|----------------------------------------|
| Soot                                              | Filter paper method                         | AVL 415s                               |
| Particle number and size                          | Differential electrical mobility separation | TSI Engine exhaust particle sizer 3090 |
| NO <sub>x</sub>                                   | Chemiluminescence detector                  | EcoPhysics CLD 700 EL                  |
| HC<br>as C <sub>3</sub> H <sub>8</sub> equivalent | Flame ionization detector                   | Rosemount – NGA 2000                   |
| CO & CO <sub>2</sub>                              | Non dispersive infrared                     | Rosemount – NGA 2000                   |
| O <sub>2</sub>                                    | Paramagnetic detector                       | Rosemount – NGA 2000                   |
| Formaldehyde & CH <sub>4</sub>                    | FTIR                                        | FEV EmissionRate                       |
| Fuel mass flow                                    | Coriolis                                    | FEV FuelRate                           |
| Air mass flow                                     | Ultrasonic                                  | FEV AirRate                            |

Table S37: Data for the vehicle, engine, and after-treatment system model.

| Parameter name                          | Value               | unit              |
|-----------------------------------------|---------------------|-------------------|
| Vehicle mass                            | 1590                | kg                |
| Gears                                   | 7                   | -                 |
| 1 <sup>st</sup> gear ratio              | 4                   | -                 |
| 2 <sup>nd</sup> gear ratio              | 2.1                 | -                 |
| 3 <sup>rd</sup> gear ratio              | 1.38                | -                 |
| 4 <sup>th</sup> gear ratio              | 1                   | -                 |
| 5 <sup>th</sup> gear ratio              | 0.78                | -                 |
| 6 <sup>th</sup> gear ratio              | 0.65                | -                 |
| 7 <sup>th</sup> gear ratio              | 0.52                | -                 |
| Final drive ratio                       | 2.93                | -                 |
| Rolling resistance curve                | $0.04v^2-0.32v+175$ | N                 |
| Drive train efficiency                  | 0.95                | -                 |
| Wheel diameter                          | 61                  | cm                |
| Engine displacement                     | 1600                | cm <sup>3</sup>   |
| Inertia of turbine and compressor wheel | $5 \times 10^{-5}$  | kg m <sup>2</sup> |
| DPF volume                              | 3000                | cm <sup>3</sup>   |
| SCR volume                              | 3600                | cm <sup>3</sup>   |
| DOC volume                              | 1300                | cm <sup>3</sup>   |
| Initial temp. of after-treatment system | 300                 | K                 |

Table S38: Variation domain for the global design of experiment (DOE) approach.

| Variation parameter                | Range           | Distribution        | Constraints                                                                                  |
|------------------------------------|-----------------|---------------------|----------------------------------------------------------------------------------------------|
| OME <sub>3-5</sub> content in fuel | 0-100%          | Predefined          | 0%, 35 vol.%, 100%                                                                           |
| Engine speed                       | 1000 – 2750 rpm | In steps of 250 rpm | No constraint                                                                                |
| Imep of the high pressure cycle    | 1.5 – 19.5 bar  | In steps of 2 bar,  | Constrained by full load at low engine speeds                                                |
| Center of combustion               | 5 – 20 °CAaTDC  | Random              | ±5 °CAaTDC from basis value for corresponding load point                                     |
| Rail pressure                      | 200 – 2000 bar  | Random              | ±300 bar from basis value for corresponding load point                                       |
| Pilot energizing time              | 180 - 300 us    | Random              | No constraint                                                                                |
| Pilot offset rel. to main Inj.     | 800 – 3000 µs   | Random              | Constrained to -30 °CAaTDC                                                                   |
| Boost pressure                     | 1 – 3 bar       | Random              | ±0.3 bar from basis value for corresponding load point                                       |
| EGR rate                           | 0-70%,          | Random              | Constrained by $\lambda > 1.1$ for diesel and by $\lambda > 0.9$ for pure OME <sub>3-5</sub> |

Table S39: The cumulated tailpipe emissions of fossil diesel, diesel-OME<sub>3-5</sub> blends, and pure OME<sub>3-5</sub> as well as the energy consumption of the passenger car.

| Fuel                                          | NO <sub>x</sub> emissions | Soot emissions | CO <sub>2</sub> emissions | Energy consumption |
|-----------------------------------------------|---------------------------|----------------|---------------------------|--------------------|
| –                                             | mg/km                     | mg/km          | g/km                      | MJ/km              |
| Fossil diesel                                 | 58                        | 0.56           | 115                       | 1.57               |
| 20 vol.-% OME <sub>3-5</sub> in fossil diesel | 40                        | 0.40           | 117                       |                    |
| 35 vol.-% OME <sub>3-5</sub> in fossil diesel | 31                        | 0.23           | 119                       |                    |
| 50 vol.-% OME <sub>3-5</sub> in fossil diesel | 25                        | 0.08           | 121                       |                    |
| Pure OME <sub>3-5</sub>                       | 25                        | 0.00           | 131                       |                    |



# **S10 Flowsheet of the OME<sub>3-5</sub> production via methanol and formaldehyde by dehydrogenation of methanol (MeOH DEHY)**

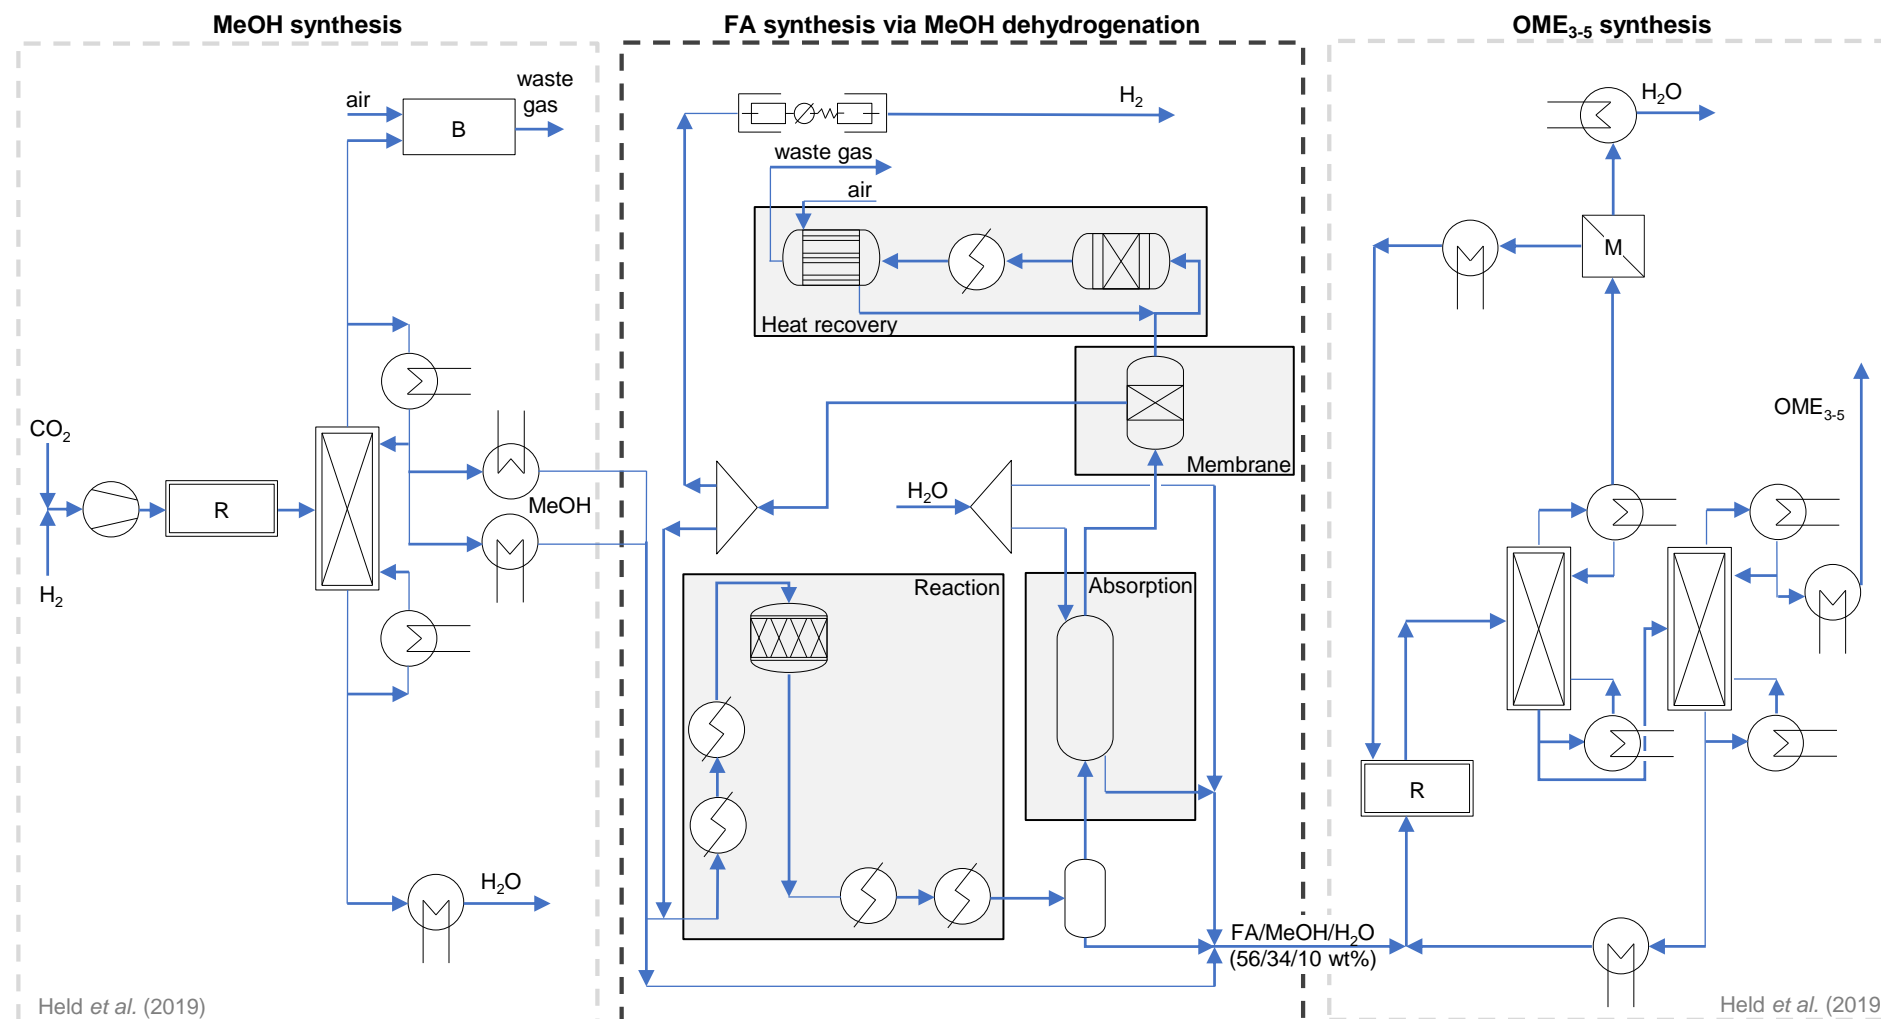

Figure S7: Flowsheet of the OME<sub>3-5</sub> route via methanol and formaldehyde by dehydrogenation of methanol (MeOH DEHY route). The simplified process flowsheets for methanol and OME<sub>3-5</sub> synthesis are taken from Held et al.,<sup>23</sup> while the formaldehyde synthesis via dehydrogenation of methanol has been developed in this study.

## S11 Calculations for the analysis of blending OME<sub>3-5</sub> gradually into the EU fleet of diesel passenger cars

### “Blend for all”: Blending OME<sub>3-5</sub> and fossil diesel for the entire fleet

We estimate the current annual mileage of the diesel passenger car fleet in the European Union (EU) ( $mileage_{\text{diesel passenger cars}}^{\text{EU,annual}}$ ) as the product of the amount of diesel passenger cars in the EU ( $n_{\text{diesel passenger cars}}^{\text{EU}}$ ) and the average annual mileage per passenger car in the EU ( $mileage_{\text{passenger car}}^{\text{EU,annual,average}}$ ):

$$mileage_{\text{diesel passenger cars}}^{\text{EU,annual}} = n_{\text{diesel passenger cars}}^{\text{EU}} \cdot mileage_{\text{passenger car}}^{\text{EU,annual,average}}. \quad (\text{Eq. 1})$$

The annual mileage of the EU fleet of diesel passenger cars results in  $1.34 \times 10^{12}$  km with 95.7 million diesel passenger cars<sup>35</sup> and an estimated average annual mileage of 14,000 km in the EU.<sup>36</sup>

The transportation demand is proportional to the total enthalpy of combustion of the diesel-OME<sub>3-5</sub> blend ( $E_{\text{blend}}$ ), assuming equal energy consumptions ( $e_{\text{diesel passenger car}}$ ) for all diesel passenger cars:

$$E_{\text{blend}} = mileage_{\text{diesel passenger cars}}^{\text{EU,annual}} \cdot e_{\text{diesel passenger car}}. \quad (\text{Eq. 2})$$

The mass of produced OME<sub>3-5</sub> is determined by the amount of available electricity ( $W_{\text{el,additional}}$ ) and the specific electricity consumption to produce 1 kg of OME<sub>3-5</sub> ( $w_{\text{el,OME}_{3-5}}$ ):

$$m_{\text{OME}_{3-5}} = \frac{W_{\text{el,additional}}}{w_{\text{el,OME}_{3-5}}}. \quad (\text{Eq. 3})$$

The enthalpy of combustion of OME<sub>3-5</sub> ( $E_{\text{OME}_{3-5}}$ ) is proportional to the mass of produced OME<sub>3-5</sub> and the specific lower heating value of OME<sub>3-5</sub> ( $LHV_{\text{OME}_{3-5}}$ ):

$$E_{\text{OME}_{3-5}} = m_{\text{OME}_{3-5}} \cdot LHV_{\text{OME}_{3-5}}. \quad (\text{Eq. 4})$$

The sum of the enthalpies of combustion of OME<sub>3-5</sub> and diesel ( $E_{\text{diesel}}$ ) equals the total enthalpy of combustion of the diesel-OME<sub>3-5</sub> blend (Figure S8), assuming ideal mixing and equal energy consumptions per km. Therefore, the enthalpy of combustion of diesel can be calculated as follows:

$$E_{\text{diesel}} = E_{\text{blend}} - E_{\text{OME}_{3-5}}. \quad (\text{Eq. 5})$$

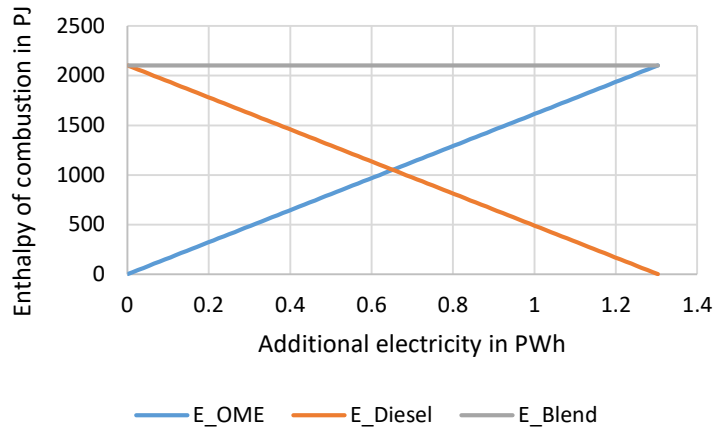

Figure S8: Energy balance of the enthalpies of combustion: The sum of both enthalpies of combustion of OME<sub>3-5</sub> and diesel equals the total enthalpy of combustion of the blend.

The mass of produced diesel ( $m_{\text{diesel}}$ ) is proportional to the enthalpy of combustion of diesel and the specific lower heating value of diesel ( $LHV_{\text{diesel}}$ ):

$$m_{\text{diesel}} = \frac{E_{\text{diesel}}}{LHV_{\text{diesel}}} \quad (\text{Eq. 6})$$

The total blend mass ( $m_{\text{blend}}$ ) is the sum of the masses of produced OME<sub>3-5</sub> and diesel:

$$m_{\text{blend}} = m_{\text{OME}_{3-5}} + m_{\text{diesel}} \quad (\text{Eq. 7})$$

The total blend mass increases with increasing mass of produced OME<sub>3-5</sub> (Figure S9). This is due to the lower specific lower heating value of OME<sub>3-5</sub> compared to that of fossil diesel: Substituting 1.0 kg of fossil diesel requires 2.2 kg of OME<sub>3-5</sub> to provide the same amount of enthalpy of combustion, assuming a constant energy consumption of the passenger car for both fuels. Note that we neglect the effect of increasing fuel mass on the mileage.

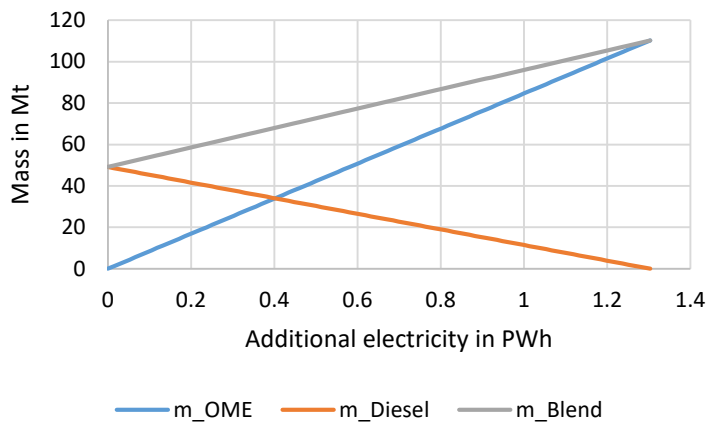

Figure S9: The total blend mass, OME<sub>3-5</sub> mass and fossil diesel mass as functions of the additionally available electricity.

The mass fractions of OME<sub>3-5</sub> ( $y_{\text{OME}_{3-5},\text{blend}}$ ) and diesel ( $y_{\text{diesel},\text{blend}}$ ) within the blend are calculated as follows:

$$y_{\text{OME}_{3-5},\text{blend}} = \frac{m_{\text{OME}_{3-5}}}{m_{\text{blend}}}, \quad (\text{Eq. 8})$$

$$y_{\text{diesel},\text{blend}} = 1 - y_{\text{OME}_{3-5},\text{blend}}. \quad (\text{Eq. 9})$$

As stated above, the total blend mass increases with increasing mass of produced OME<sub>3-5</sub>. This results in nonlinear functions of additional electricity for both mass fractions (Figure S10). The mass fraction of OME<sub>3-5</sub>, which equals the specific blending ratio of OME<sub>3-5</sub>, is a concave function of the amount of additionally available electricity. A blending component with a higher lower heating value than fossil diesel would instead result in a convex function, while a blending component with the same lower heating value as fossil diesel would result in a linear function.

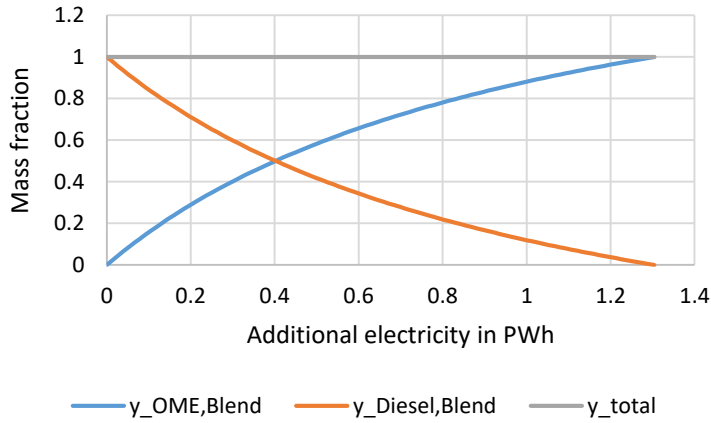

Figure S10: The mass fractions of OME<sub>3-5</sub> and diesel within the blend as functions of the additionally available electricity.

The specific blending ratio of OME<sub>3-5</sub> ( $BR_{\text{mass}}$ ) equals the mass fraction of OME<sub>3-5</sub> within the blend:

$$BR_{\text{mass}} = \frac{m_{\text{OME}_{3-5}}}{m_{\text{blend}}} = y_{\text{OME}_{3-5},\text{blend}}. \quad (\text{Eq. 10})$$

The volumetric blending ratio of OME<sub>3-5</sub> ( $BR_{\text{volumetric}}$ ) is the ratio of the OME<sub>3-5</sub> volume ( $V_{\text{OME}_{3-5}}$ ) and the total blend volume. The total blend volume is the sum of the OME<sub>3-5</sub> and the diesel volume ( $V_{\text{diesel}}$ ). Both the OME<sub>3-5</sub> and diesel volume are proportional to the ratios of their masses and densities ( $\rho_{\text{OME}_{3-5}}$  and  $\rho_{\text{diesel}}$ ):

$$BR_{\text{volumetric}} = \frac{V_{\text{OME}_{3-5}}}{V_{\text{OME}_{3-5}} + V_{\text{diesel}}} = \frac{m_{\text{OME}_{3-5}}/\rho_{\text{OME}_{3-5}}}{m_{\text{OME}_{3-5}}/\rho_{\text{OME}_{3-5}} + m_{\text{diesel}}/\rho_{\text{diesel}}}. \quad (\text{Eq. 11})$$

The lower heating value of the blend ( $LHV_{\text{blend}}$ ) is obtained by the sum of the products of each component's mass fraction and specific lower heating value:

$$\begin{aligned} LHV_{\text{blend}} &= \sum_i y_{i,\text{blend}} \cdot LHV_i \\ &= y_{\text{OME}_{3-5},\text{blend}} \cdot LHV_{\text{OME}_{3-5}} + y_{\text{diesel},\text{blend}} \cdot LHV_{\text{diesel}} . \end{aligned} \quad (\text{Eq. 12})$$

The lower heating value of the diesel-OME<sub>3-5</sub> blend is a convex, monotonically decreasing function of the amount of additionally available electricity and ranges in the interval of both pure fuels' lower heating values (Figure S11).

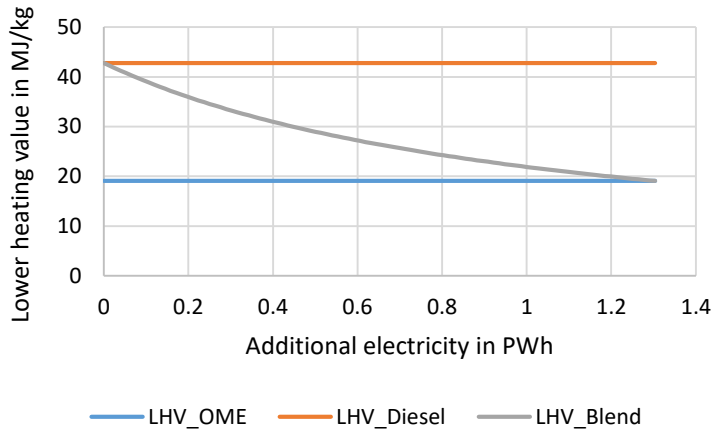

Figure S11: The lower heating values of pure OME<sub>3-5</sub> and pure fossil diesel as well as the lower heating value of diesel-OME<sub>3-5</sub> blends as function of the additionally available electricity.

The environmental impact (EI) of the fleet for “blend for all” ( $EI_{\text{Fleet}}^{\text{Blend for all}}$ ) follows from emission measurements for each volumetric blending ratio (cf. Section 3.2 and S9).

#### “Pure for few”: Using pure OME<sub>3-5</sub> and pure fossil diesel separately in the fleet

For “pure for few,” we calculate the mileage of diesel passenger cars with pure OME<sub>3-5</sub> as the fraction of the enthalpy of combustion of OME<sub>3-5</sub> ( $E_{\text{OME}_{3-5}}$ ) and the energy consumption of diesel passenger cars ( $e_{\text{diesel passenger car}}$ ). The enthalpy of combustion of OME<sub>3-5</sub> follows from the amount of produced OME<sub>3-5</sub> depending on the available electricity for OME<sub>3-5</sub> production (Eq. 3 and 4).

$$\text{mileage}_{\text{OME}_{3-5}} = \frac{E_{\text{OME}_{3-5}}}{e_{\text{diesel passenger car}}} . \quad (\text{Eq. 13})$$

We estimate the mileage of diesel passenger cars with pure fossil diesel by subtracting the mileage of diesel passenger cars with pure OME<sub>3-5</sub> from the current annual mileage of the EU fleet of diesel passenger cars (Eq. 1):

$$\text{mileage}_{\text{diesel}} = \text{mileage}_{\text{diesel passenger cars}}^{\text{EU,annual}} - \text{mileage}_{\text{OME}_{3-5}} . \quad (\text{Eq. 14})$$

The mileage shares of pure OME<sub>3-5</sub> and pure fossil diesel can then be calculated as follows:

$$share_{OME_{3-5}}^{mileage} = \frac{mileage_{OME_{3-5}}}{mileage_{EU,annual}^{diesel passenger cars}}, \quad (Eq. 15)$$

$$share_{diesel}^{mileage} = \frac{mileage_{diesel}}{mileage_{EU,annual}^{diesel passenger cars}} = 1 - share_{OME_{3-5}}^{mileage}. \quad (Eq. 16)$$

The environmental impact (EI) of the fleet for “pure for few” ( $EI_{Fleet}^{Pure\ for\ few}$ ) is the sum of the products of the mileage shares and the environmental impacts of driving a diesel passenger car with pure OME<sub>3-5</sub> ( $EI_{OME_{3-5},pure}$ ) and pure fossil diesel ( $EI_{diesel,pure}$ ), respectively. The environmental impacts of pure OME<sub>3-5</sub> and pure fossil diesel stem from emission measurements (cf. Section 3.2 and S9).

$$EI_{Fleet}^{Pure\ for\ few} = share_{OME_{3-5}}^{mileage} \cdot EI_{OME_{3-5},pure} + share_{diesel}^{mileage} \cdot EI_{diesel,pure} \quad (Eq. 17)$$

## **S12 Contribution analyses of the well-to-wheel environmental impacts for “blend for all” as function of the additionally available electricity for OME<sub>3-5</sub> production**

In this section, we present contribution analyses of the environmental impacts for the case “blend for all” and various electricity supplies as function of the additionally available electricity for OME<sub>3-5</sub> production.

Note that respiratory effects and photochemical ozone formation are significantly higher with electricity from photovoltaic (Figure S14) than with electricity from wind power (Figure S17). The considered LCA datasets of the LCA database GaBi assume manufacturing of photovoltaic modules mostly in China, whereas most wind turbine components are assumed to be produced in Europe. In contrast to Europe, China's electricity mix has a higher proportion of coal-fired power plants with higher specific NO<sub>x</sub>, sulphur dioxide, and particulate matter emissions, increasing both environmental impacts strongly.<sup>28</sup>

Furthermore, photochemical ozone formation shows a minimum between 0 and 0.5 PWh of additional electricity for Switzerland, France, and photovoltaic (Figure S12-S14). For these electricity supplies, emissions from electricity production overcompensate the nonlinear reduction of NO<sub>x</sub> emissions during fuel combustion at these minima.

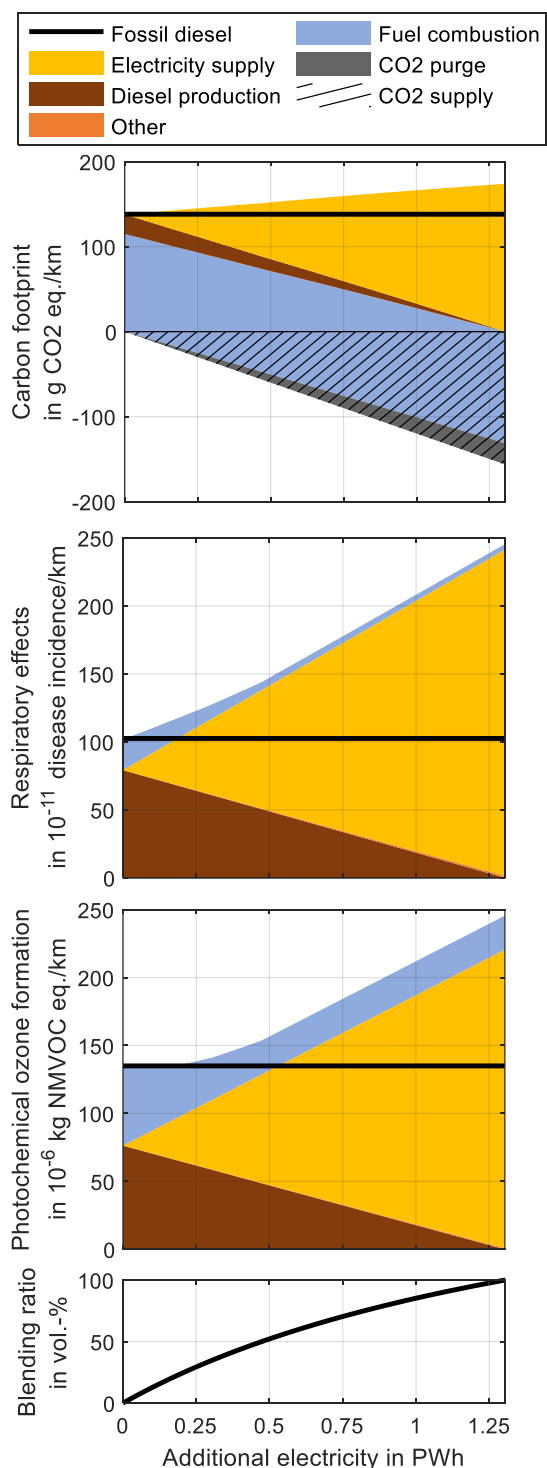

Figure S12: Well-to-wheel carbon footprint, respiratory effects, photochemical ozone formation, and the volumetric blending ratio as functions of additionally available electricity for OME<sub>3-5</sub> production. Results are shown for the electricity supply of **Switzerland (CH)**. The well-to-wheel impacts include emissions along the entire life cycle of diesel-OME<sub>3-5</sub> blends. The black bold line represents the environmental impacts of the conventional fossil diesel system. CO<sub>2</sub> is supplied by an ammonia plant.

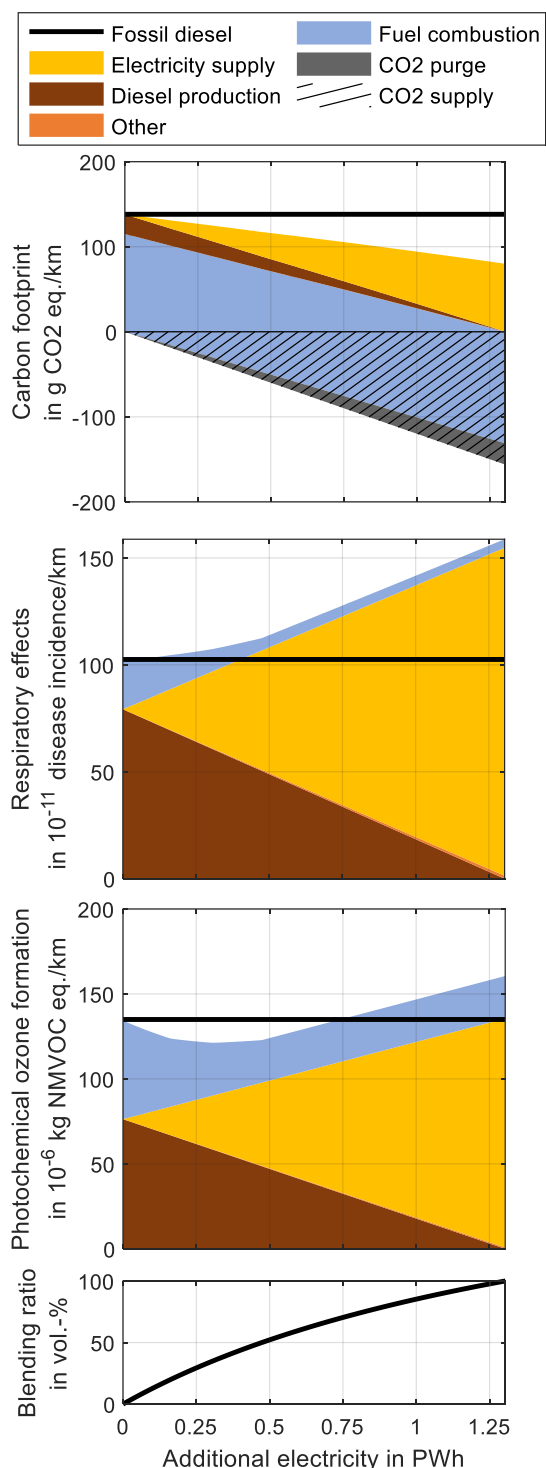

Figure S13: Well-to-wheel carbon footprint, respiratory effects, photochemical ozone formation, and the volumetric blending ratio as functions of additionally available electricity for OME<sub>3-5</sub> production. Results are shown for the electricity supply of **France (FR)**. The well-to-wheel impacts include emissions along the entire life cycle of diesel-OME<sub>3-5</sub> blends. The black bold line represents the environmental impacts of the conventional fossil diesel system. CO<sub>2</sub> is supplied by an ammonia plant.



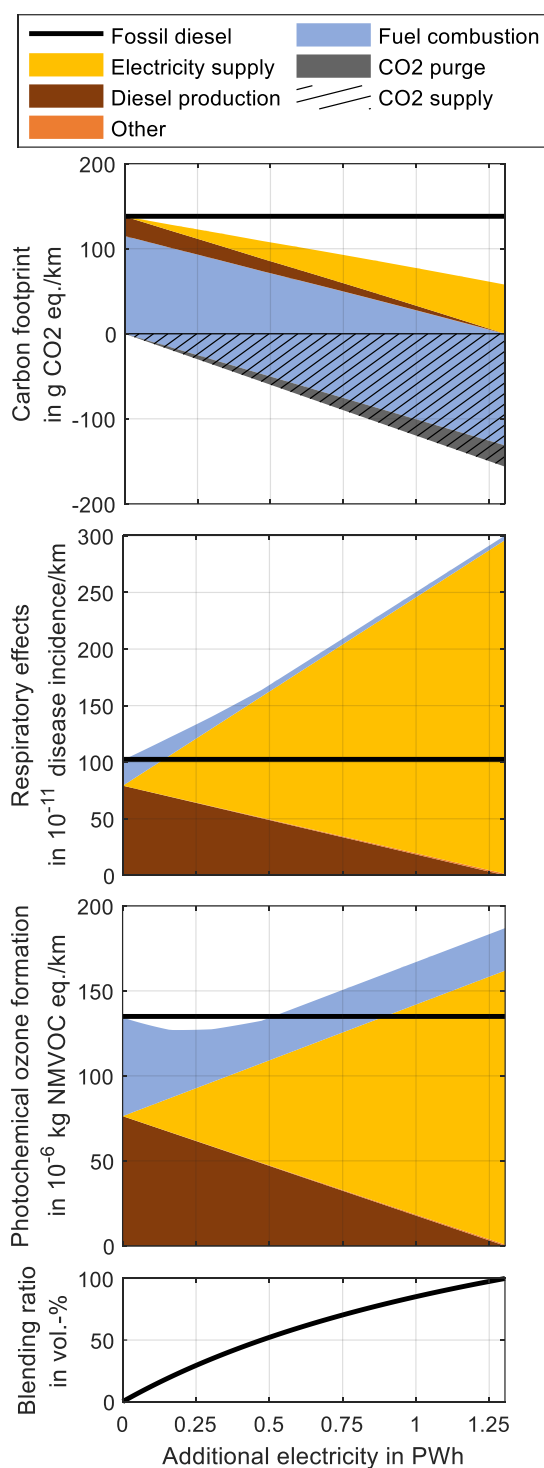

Figure S14: Well-to-wheel carbon footprint, respiratory effects, photochemical ozone formation, and the volumetric blending ratio as functions of additionally available electricity for OME<sub>3-5</sub> production. Results are shown for the electricity supply by **photovoltaic (PV)**. The well-to-wheel impacts include emissions along the entire life cycle of diesel-OME<sub>3-5</sub> blends. The black bold line represents the environmental impacts of the conventional fossil diesel system. CO<sub>2</sub> is supplied by an ammonia plant.

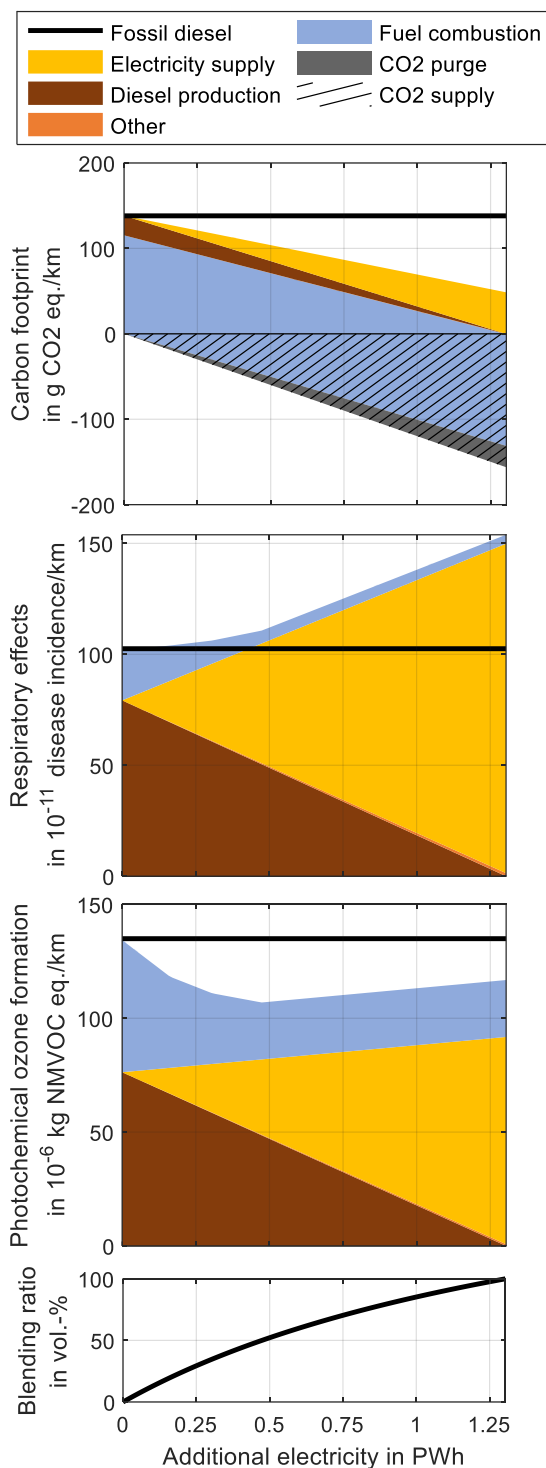

Figure S15: Well-to-wheel carbon footprint, respiratory effects, photochemical ozone formation, and the volumetric blending ratio as functions of additionally available electricity for OME<sub>3-5</sub> production. Results are shown for the electricity supply by **solar-thermal (ST) energy**. The well-to-wheel impacts include emissions along the entire life cycle of diesel-OME<sub>3-5</sub> blends. The black bold line represents the environmental impacts of the conventional fossil diesel system. CO<sub>2</sub> is supplied by an ammonia plant.

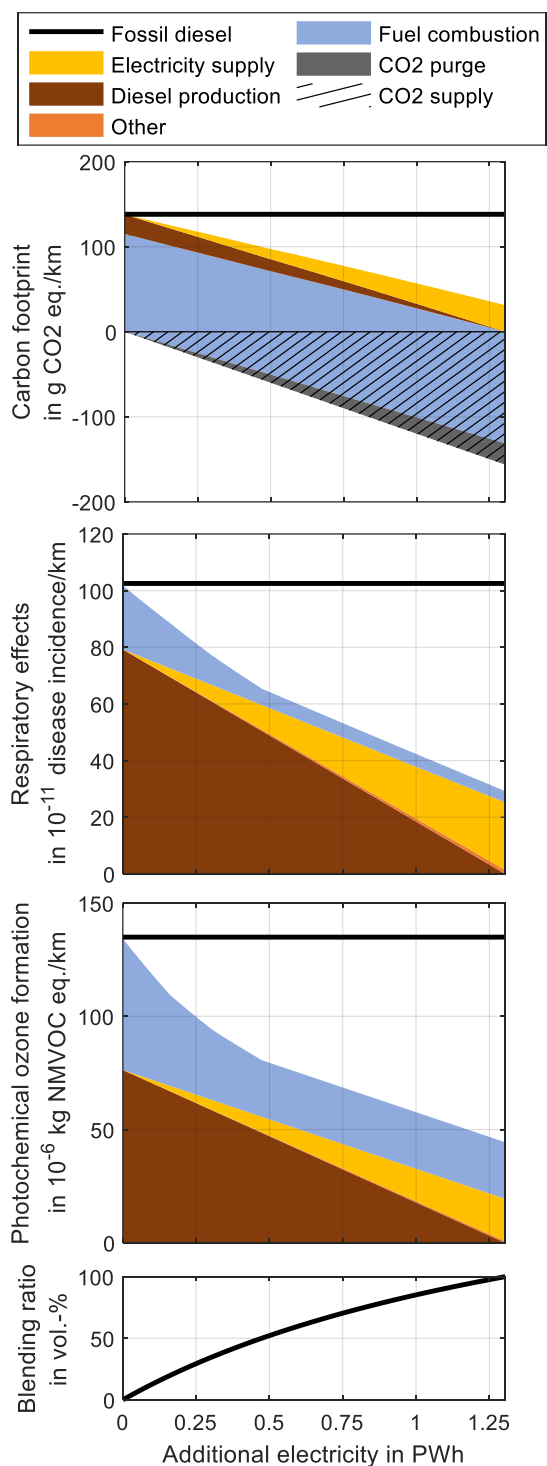

Figure S16: Well-to-wheel carbon footprint, respiratory effects, photochemical ozone formation, and the volumetric blending ratio as functions of additionally available electricity for OME<sub>3-5</sub> production. Results are shown for the electricity supply of **Norway (NO)**. The well-to-wheel impacts include emissions along the entire life cycle of diesel-OME<sub>3-5</sub> blends. The black bold line represents the environmental impacts of the conventional fossil diesel system. CO<sub>2</sub> is supplied by an ammonia plant.

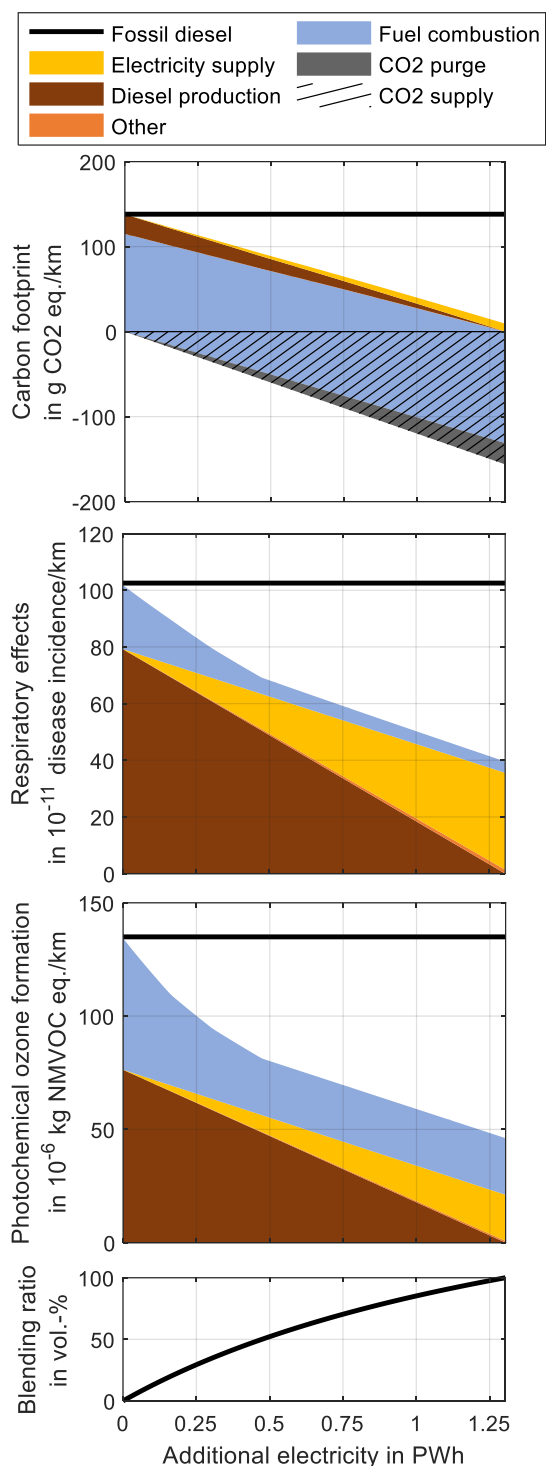

Figure S17: Well-to-wheel carbon footprint, respiratory effects, photochemical ozone formation, and the volumetric blending ratio as functions of additionally available electricity for OME<sub>3-5</sub> production. Results are shown for the electricity supply by **wind power**. The well-to-wheel impacts include emissions along the entire life cycle of diesel-OME<sub>3-5</sub> blends. The black bold line represents the environmental impacts of the conventional fossil diesel system. CO<sub>2</sub> is supplied by an ammonia plant.

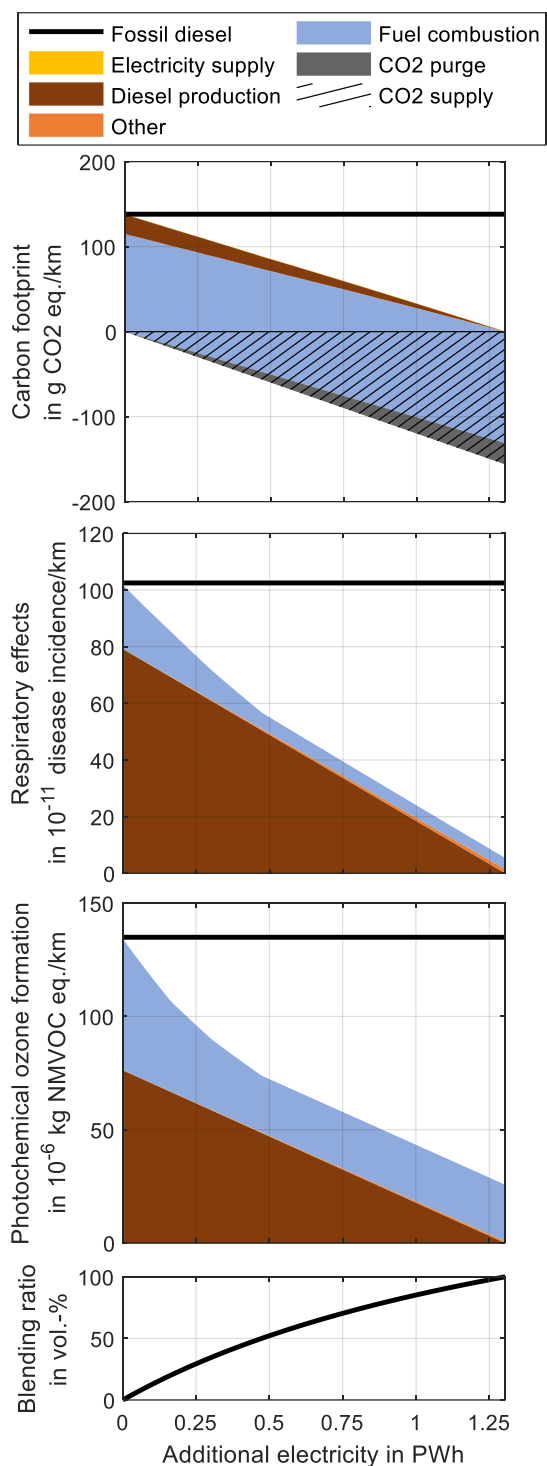

Figure S18: Well-to-wheel carbon footprint, respiratory effects, photochemical ozone formation, and the volumetric blending ratio as functions of additionally available electricity for OME<sub>3-5</sub> production. Results are shown for the **theoretical limit of a burden-free electricity supply**. The well-to-wheel impacts include emissions along the entire life cycle of diesel-OME<sub>3-5</sub> blends. The black bold line represents the environmental impacts of the conventional fossil diesel system. CO<sub>2</sub> is supplied by an ammonia plant.

## S13 References

1. G. Maurer, *AIChE J.*, 1986, **32**(6), 932.
2. N. Schmitz, F. Homberg, J. Berje, J. Burger and H. Hasse, *Ind. Eng. Chem. Res.*, 2015, **54**(25), 6409.
3. J. Burger, M. Siegert, E. Ströfer and H. Hasse, *Fuel*, 2010, **89**(11), 3315.
4. N. Schmitz, E. Ströfer, J. Burger and H. Hasse, *Ind. Eng. Chem. Res.*, 2017, **56**(40), 11519.
5. G. Reuss, W. Disteldorf, A. O. Gamer and A. Hilt in *Ullmann's Encyclopedia of Industrial Chemistry*, Wiley-VCH Verlag GmbH & Co. KGaA, Weinheim, Germany, 2000, p 377.
6. T. Grützner, H. Hasse, N. Lang, M. Siegert and E. Ströfer, *Chemical Engineering Science*, 2007, **62**(18-20), 5613.
7. J. Mahieux, *Hydrocarbon Process., Int. Ed.*, 1969, **48**, 163.
8. J.-O. Weidert, J. Burger, M. Renner, S. Blagov and H. Hasse, *Ind. Eng. Chem. Res.*, 2017, **56**(2), 575.
9. J. Burger, E. Ströfer and H. Hasse, *Ind. Eng. Chem. Res.*, 2012, **51**(39), 12751.
10. L. Wang, W.-T. Wu, T. Chen, Q. Chen and M.-Y. He, *Chemical Engineering Communications*, 2014, **201**(5), 709.
11. Q. Wu, M. Wang, Y. Hao, H. Li, Y. Zhao and Q. Jiao, *Ind. Eng. Chem. Res.*, 2014, **53**(42), 16254.
12. J. Wu, H. Zhu, Z. Wu, Z. Qin, L. Yan, B. Du, W. Fan and J. Wang, *Green Chem.*, 2015, **17**(4), 2353.
13. Y. Wu, Z. Li and C. Xia, *Ind. Eng. Chem. Res.*, 2016, **55**(7), 1859.
14. L. Lautenschütz, D. Oestreich, P. Haltenort, U. Arnold, E. Dinjus and J. Sauer, *Fuel Processing Technology*, 2017, **165**, 27.
15. D. Bongartz, J. Burre and A. Mitsos, *Ind. Eng. Chem. Res.*, 2019, **58**(12), 4881.
16. J. Burre, D. Bongartz and A. Mitsos, *Ind. Eng. Chem. Res.*, 2019, **58**(14), 5567.
17. Z. Azizi, M. Rezaeimanesh, T. Tohidian and M. R. Rahimpour, *Chemical Engineering and Processing - Process Intensification*, 2014, **82**, 150.
18. W.-J. Shen, K.-W. Jun, H.-S. Choi and K.-W. Lee, *Korean J. Chem. Eng.*, 2000, **17**(2), 210.
19. C. F. Breitzkreuz, N. Schmitz, E. Ströfer, J. Burger and H. Hasse, *Chemie Ingenieur Technik*, 2018, **90**(10), 1489.
20. D. Bongartz, L. Doré, K. Eichler, T. Grube, B. Heuser, L. E. Hombach, M. Robinius, S. Pischinger, D. Stolten, G. Walther and A. Mitsos, *Applied Energy*, 2018, **231**, 757.
21. H. Hasse, I. Hahnenstein and G. Maurer, *AIChE J.*, 1990, **36**(12), 1807.
22. N. Schmitz, J. Burger and H. Hasse, *Ind. Eng. Chem. Res.*, 2015, **54**(50), 12553.
23. M. Held, Y. Tönges, D. Pélerin, M. Härtl, G. Wachtmeister and J. Burger, *Energy Environ. Sci.*, 2019, **12**(3), 1019.
24. Shoujin Su, Philippe Zaza and Albert Renken, *Chemical Engineering & Technology*, 1994, **17**(1), 34.

25. N. Y. Usachev, I. M. Krukovskii and S. A. Kanaev, *Petroleum Chemistry*, 2004, **44**(6), 379.
26. M. Osugi and T. Uchiyama, *Process for the preparation for formaldehyde*, US Patent 4,054,609, 1977.
27. G. Wernet, C. Bauer, B. Steubing, J. Reinhard, E. Moreno-Ruiz and B. Weidema, *Int J Life Cycle Assess*, 2016, **21**(9), 1218.
28. GaBi, *GaBi 9.2.0.58: Software-System and Database for Life Cycle Engineering, DB 8.7 - SP 39*, thinkstep AG, Leinfelden-Echterdingen, Germany, 2019.
29. A. David, B. V. Mathiesen, H. Averfalk, S. Werner and H. Lund, *Energies*, 2017, **10**(4), 578.
30. L. J. Müller, A. Kätelhön, M. Bachmann, A. Zimmermann, A. Sternberg and A. Bardow, *Front. Energy Res.*, 2020, **8**, 1.
31. M. Reuß, T. Grube, M. Robinius, P. Preuster, P. Wasserscheid and D. Stolten, *Applied Energy*, 2017, **200**, 290.
32. S. Deutz and A. Bardow, *Nat Energy*, 2021.
33. N. von der Assen, L. J. Müller, A. Steingrube, P. Voll and A. Bardow, *Environmental science & technology*, 2016, **50**(3), 1093.
34. J. Burger, E. Ströfer and H. Hasse, *Chemical Engineering Research and Design*, 2013, **91**(12), 2648.
35. Eurostat, Passenger cars in the EU, [https://ec.europa.eu/eurostat/statistics-explained/index.php/Passenger\\_cars\\_in\\_the\\_EU](https://ec.europa.eu/eurostat/statistics-explained/index.php/Passenger_cars_in_the_EU) (last accessed January 2021).
36. S. Siegemund, M. Trommler, O. Kolb and V. Zinnecker, *E-fuels study: The potential of electricity-based fuels for low-emission transport in the EU: An expertise by LBST and dena*, Deutsche Energie-Agentur GmbH (dena), Berlin, 2017.
